# Supplementary material for: Essential function of transmembrane transcription factor MYRF in promoting transcription of miRNA lin-4 during C. elegans development
Source: eLife. 2024 Jul 4;12:RP89903. doi: 10.7554/eLife.89903 (PMC11223767; doi:10.7554/eLife.89903)
Supplement: Figure 1—source data 1. [file elife-89903-fig1-data1.xlsx]

## Sheet: Sheet1
		Cell membrane	Cell membrane & Nucleus	Nucleus	Total number of animals
	6h	100	0	0	31
	15h	15.1515	33.3333	51.5152	33
	20h	0	38.4615	61.5385	39
