# Supplementary material for: Essential function of transmembrane transcription factor MYRF in promoting transcription of miRNA lin-4 during C. elegans development
Source: eLife. 2024 Jul 4;12:RP89903. doi: 10.7554/eLife.89903 (PMC11223767; doi:10.7554/eLife.89903)
Supplement: Figure 1—source data 2. [file elife-89903-fig1-data2.xlsx]

## Sheet: Sheet1
EL1(6h)	LL1(14h)	EL2(20h)
151.928	21625.9	18021.2
139.992	8817.11	15018.5
187.785	13207.3	16794.1
194.493	11170	26029.4
239.891	7237.02	30604.5
23.636	12719	26379.3
156.235	29994.7	28274.3
146.353	20389.1	16861.3
102.951	25545.8	29344.5
81.118	28673.8	23190.7
139.103	37453.6	24314.4
116.863	17814.8	25753.9
144.119	37793	24084
101.431	26536.3	26035.4
79.338	29162	20738.9
60.264	32560.5	23253.8
74.558	25892.3	18992.9
147.293	31397.1	18179.2
146.023	36601	12793.3
93.328	27456.6	16848
174.567	21114.3	22640.8
