# Supplementary material for: Essential function of transmembrane transcription factor MYRF in promoting transcription of miRNA lin-4 during C. elegans development
Source: eLife. 2024 Jul 4;12:RP89903. doi: 10.7554/eLife.89903 (PMC11223767; doi:10.7554/eLife.89903)
Supplement: Figure 2—figure supplement 1—source data 1. [file elife-89903-fig2-figsupp1-data1.xlsx]

## Sheet: Sheet1
WT	syb1491	syb1468
31039.7	1410.04	2475.47
34493.7	2442.7	1784.73
36212.4	2607.33	1907.69
37819.5	1742.35	1558.27
45382.5	2112.75	2286.17
34706.3	2638.06	1830.28
29510.2	3072.45	2408.46
25950.7	1999.41	1143.5
34822.5	3057.22	1349.34
34498.7	3183.29	1523.92
28461.3	3793.06	2161.99
28435.9	3020.7	911.072
27383.7	3733.82	2130.01
36024.6	2942.22	1407.63
35397.5	2551.58	742.191
33551.9	2316.82	1523.36
29257.4	2263.98	2234.8
35080.6	2750.67	2198.57
30108.6	1743.7	2681.77
28095.1	2421.46	3362.7
33211.9	1799.89	1497.38
36377.9	1310.56	2123.85
37746.2	2685.26	2184.46
36532.2	2313.55	1522.48
32958.2	2197.86	2362.17
35628.8	2448.84	1586.64
34890	2598.48	1104.62
24479.3	2621.15	931.316
22926.7	3783.73	2885.15
18428.8	1425.6	1447.55
20163.8	1839.87	1783.83
	1692.68	1812.63
	1702.35	1407.39
	1775.19	944.513
	1672.56	1982.56
	2356.89
	4585.05
	2603.78
	3460.13
