# Supplementary material for: Essential function of transmembrane transcription factor MYRF in promoting transcription of miRNA lin-4 during C. elegans development
Source: eLife. 2024 Jul 4;12:RP89903. doi: 10.7554/eLife.89903 (PMC11223767; doi:10.7554/eLife.89903)
Supplement: Figure 2—figure supplement 3—source data 1. [file elife-89903-fig2-figsupp3-data1.xlsx]

## Sheet: pharynx
WT EL1	myrf-1(ju1121) EL1	WT LL1	myrf-1(ju1121) LL1	WT Mid-L2	myrf-1(ju1121) Mid L2
244.703	246.327	1485.74	776.972	45591.2	16589.6
246.388	247.214	2949.58	428.589	29883.6	28734.8
254.375	282.582	2705.38	923.485	53324.9	32109.4
250.074	255.199	4627.1	3368.16	43482.3	31673.1
253.538	276.086	8505.32	6151.7	58036.3	11462.4
251.771	252.142	8255.97	6178.78	40008.8	18697.1
251.032	251.517	4403.44	4000.59	46756.5	35364.5
246.733	266.976	20950.2	6894.87	50004.5	26599.1
251.647	250.168	1321.08	4948.49	62644.7	7243.93
248.781	256.818	2630.22	1377.48	46596.7	20670.3
248.651	262.914	10211.1	19643.2	40732.1	10746.1
248.099	266.776	309.742	3519.59	29348.8	26649.3
249.034	259.45	1783.52	1522.35	14678.5	24422.4
246.844	259.765	4841.35	7328.1	12423.4	13517.6
252.317	251.616	788.39	13913.3	31128.2	18091.2
246.936	245.784	480.524	878.986	45880	32472.9
263.706	242.201	4259.92	2104.15	58718	31195.3
263.516	257.177	17158.3	1284.45	56354.5	30009.2
261.308	245.458	4605.6	1324.93	34965	38463.9
259.661	258.656	5785.06	5442.88	39743.8	8954.4
256.643	258.147	7106.09	5670.32	48740.8	38382.5
258.429	244.809	10088.7	16632.3	47080.9	34327.9
247.733	255.978	17827.1	34312.5	43675.6	38577.7
251.041		24344.8	4394.71	39014	37285.2
252.014		22873.2	38024.1	35669.4	17662.7
247.347		14148.9	10002.3	44551.6	36818.2
247.096		7871.19	7120.63	27923.3	23230.7
249.21		5448.07	648.321	50881.2	29287.2
250.615		8254.67	4882.39	50652.3	18845.1
251.086		2599.15	3646.05	53499.6	12242.1
244.912			11182	45526.1	25981.8
249.05			19698.8	53815.2	11576.4
251.143			1343.98	58065.3	24240
248.347			343.978	46388	15305
251.147			5632.38	59525.1	11917.9
244.471			9118	46760.4	16153.6
247.486			5531.41		18376.5
246.895			790.646		22330.9
251.739			8317.16		24122
244					28479.3
249.529					21909.9
250.344					20385.7
266.951					16729.2
					38583.5
					4170.37
					33415.2
					22644
					24121
					1013.3

## Sheet: head neuron
WT LL1	myrf-1(ju1121) EL1	WT LL1	myrf-1(ju1121) LL1	WT Mid-L2	myrf-1(ju1121) Mid L2
245.478	260.091	2666.28	673.406	26446.6	775.896
248.934	258.607	2014.67	514.244	16453.5	741.409
250.498	248.237	1023.72	608.352	17148.3	2024.94
253.82	250.564	1394.22	783.753	20537.5	1076.38
246.594	244.738	433.108	538.125	17918.2	1198.85
256	246.709	602.21	416.269	21651.6	955.5
250.833	248.565	616.309	519.221	18191.5	1084.45
247.804	263.176	807.499	759.637	15832.5	949.996
243.426	249.337	723.675	554.952	15130.1	803.751
247.017	265.022	674.875	537.77	12174.7	711.672
251.46	243.346	7634.43	485.329	11612.4	787.13
243.897	240.129	2383.12	525.84	9936.31	902.096
262.517	240.129	1291.34	491.288	9986.02	1588.15
268.423	251.941	623.938	494.937	18990.7	1105.27
265.238	242.727	980.427	680.761	32776.4	694.016
267.163	240.098	3508.93	631.038	24205.5	573.17
271.075	238.04	313.198	508.08	12610.1	909.787
266.074	241.311	850.559	546.605	16476.8	1629.28
250.03	240.93	1268.24	589.503	17919.5	1052.49
247.245	253.711	4376.37	503.14	17363.6	928.865
250.611	250.919	6557.32	555.322	15546.6	1325.22
251.412	235.454	8949.42	647.267	19670.2	1324.87
247.948	245.885	7588.56	943.736	16238.8	851.189
250.693	257.733	2745.44	652.128	26425.4	1552.55
251.032	236.232	1490.42	562.771	10984.3	972.746
252.807		1524.77	555.901	22509.9	677.235
248.969		2526.03	804.812	18279.7	1259.98
249.793		1778.65	484.022	18221.8	1010.48
241.478		765.191	481.489	25079.4	1311.14
242.179		4632.66	543.862	25709	1603.93
245.953		2351.38	643.518	25008.6	976.326
247.179		2811.06	844.606	21031.3	687.481
248.074		1202.91	917.095	31963.8	900.905
250.786			429.697	19791.3	859.595
247.661			632.16		1245.9
246.674			486.642		813.45
250.849			653.309		958.407
244.093			582.213		701.135
249.558			710.486		926.604
244.97			708.558		639.852
250.109			608.865		585.634
252.468			560.457		1048.53
248.746			591.091		627.122
249.815			852.413		940.807
			729.687		959.559
			659.428		977.819
			623.099		866.676
					857.453
					983.152
