# Supplementary material for: Essential function of transmembrane transcription factor MYRF in promoting transcription of miRNA lin-4 during C. elegans development
Source: eLife. 2024 Jul 4;12:RP89903. doi: 10.7554/eLife.89903 (PMC11223767; doi:10.7554/eLife.89903)
Supplement: Figure 2—figure supplement 4—source data 1. [file elife-89903-fig2-figsupp4-data1.xlsx]

## Sheet: Sheet1
L2	L2+NAAK	L2+Mock	L3	L3+NAAK	L3+Mock	L4	L4+NAAK	L4+Mock
7351.07	2808.62	7974.66	7563.31	4673.16	12343.7	19449.1	7481.67	25694.3
9899.88	3555.66	7302.22	7614.01	2142.62	9896.9	21521.8	7104.32	18516.4
7358.36	3178.16	7417.87	7522.75	5520.86	12889.1	25248	7293.5	14304
6160.64	4491.4	5520.47	8016.98	5801.84	7192.72	27094.7	4351.56	7395.31
7252.78	2464.58	3140.02	8763.25	5407.06	17756.9	19596.8	6677.08	22432
7170.8	3004.2	7924.05	6727.1	6123.56	11052.7	21906.8	5255.33	17477.2
9837.36	3264.7	6673.82	6452.96	5828.05	18281.6	18900.6	7285.88	28137.2
9825.45	4900.66	5014.43	6172.79	5328.26	15628.5	25205.7	5734.21	50396.2
7533.09	1326.15	7344.95	6927.05	1187.23	11139.5	22848	4506.2	29525.9
6898.28	3398.29	6053.14	10043.5	2499.55	11281.5	22401.9	7980.3	47213.2
8466.47	3079.96	7029.77	7967.42	2274.52	11920.7	20956.4	7978.49	42424.9
5853.97	3410.79	10017.6	8099.44	4097.52	14988.1	19543.2	7553.13	44883.9
8439.5	4611.46	5903.54	5956.51	1766.85	11350.4	31704.5	7912.48	18907.9
7155.38	3623.22	7189.86	6957.59	1836.33	17308.3	31573.7	5120.62	26491.8
7575.31	3730.61	7253.53	9085.77	1824.04	14625.4	18062.2	11348.4	17826
5376.46	4028.08	7204.73	8478.22	4128.63	12374	26323.7	13299.4	21108.8
7238.31	4127.9	10315.8	12701.5	3176.59	13355.2	18016.1	10877.4	28962.4
4884.27	2055.47	9728.82	6894.73	1698.56	20890.1	18222.5	7890.1	31165.3
6582.08	2512.99	6812.03	12925.6	1466.59	10012.1	20239.3	5986.44	21217.6
7473.01	1694.35	8505.22	6673.36		9988.71	21400.8	5177.84	22336
3092.8	2207.81	7725.88	9390.63			12983.3	4476.47	22100.4
	2388.79		3873.41			18778	4881.93
	1943.83		6530.41			16867.9	7132.56
	3543.71		9192.71			21977.8	4197.85
	2841.92		10854.3			17483.8	5581.17
	2440.78		13454.6
	3262.17		10438.5
	2531.15		8340.76
	2535.17		10237.2
	2010.07		8741.66
			8352.76
			10209.2
			11518.8
			10642.2
