# Supplementary material for: Essential function of transmembrane transcription factor MYRF in promoting transcription of miRNA lin-4 during C. elegans development
Source: eLife. 2024 Jul 4;12:RP89903. doi: 10.7554/eLife.89903 (PMC11223767; doi:10.7554/eLife.89903)
Supplement: Figure 2—source data 1. [file elife-89903-fig2-data1.xlsx]

## Sheet: Sheet1
WT EL1	myrf-1(ju1121) EL1	WT LL1	myrf-1(ju1121) LL1	WT L2	myrf-1(ju1121) L2
151.928	190.446	21075.5	175.82	15913.4	116.496
139.992	104.646	16327.9	227.39	17784.1	141.079
187.785	141.542	4192.28	49.657	14132.7	110.357
194.493	154.02	6706.14	91.027	23863	151.605
239.891	107.869	22361.6	79.759	19083.6	131.365
23.636	151.098	8925.85	61.131	13594.4	86.059
156.235	110.844	21122.9	55.758	14686	223.986
146.353	134.506	26187.2	145.701	14965.3	173.56
102.951	214.409	13761	79.42	14235.6	211.694
81.118	117.079	21140.5	102.536	13125.4	195.568
139.103	118.389	13911.3	50.91	24279	217.415
116.863	110.111	28690.1	12.056	20981.6	101.11
144.119	153.857	15125.8	49.407	27078.9	389.205
101.431	93.617	16113.9	43.107	20627	287.684
79.338	93.458	24671.1	85.397	16010.1	195.965
60.264	79.656	27456.6	7.109	19739.6	175.5
74.558	56.756	21114.3	2.006	32634.4	125.846
147.293	52.028		29.06	16923.2	163.576
146.023	94.238		77.206		93.556
93.328	120.755		56.562		179.363
174.567	101.768		123.384		146.125
	67.211		44.065		96.557
	63.023		78.995		136.504
	134.286		29.365		199.326
	140.796		114.829		146.857
	118.222
	82.038
