# Supplementary material for: Essential function of transmembrane transcription factor MYRF in promoting transcription of miRNA lin-4 during C. elegans development
Source: eLife. 2024 Jul 4;12:RP89903. doi: 10.7554/eLife.89903 (PMC11223767; doi:10.7554/eLife.89903)
Supplement: Figure 2—source data 2. [file elife-89903-fig2-data2.xlsx]

## Sheet: Sheet1
WT	myrf-1(ybq6)	myrf-1(ybq6),myrf-2(ybq42)	myrf-2(ybq42)
15063.2	2645.94	371.487	18776.2
18620.2	3030.55	359.411	19584.8
15679.9	2599.91	366.85	15852.2
11514.6	3578.75	357.224	20628.9
10612.8	2960.54	407.18	19664
14933.4	2548.95	366.52	6962.93
15344.6	2738.24	324.299	19614.9
14013	2170.19	379.8	22563.2
15450.3	3403.77	360.699	15772
16037.7	3116.86	280.646	16929.2
13345.1	2892.52	467.686	11659.1
	3672.16	360.839
	2915.82	378.774
	2766.94	392.453
	3053.02	387.929
	2514.62	466.86
	2906.66	413.945
	2856.36
