# Supplementary material for: Essential function of transmembrane transcription factor MYRF in promoting transcription of miRNA lin-4 during C. elegans development
Source: eLife. 2024 Jul 4;12:RP89903. doi: 10.7554/eLife.89903 (PMC11223767; doi:10.7554/eLife.89903)
Supplement: Figure 2—source data 3. [file elife-89903-fig2-data3.xlsx]

## Sheet: Sheet1
WT EL1	myrf-1(ju1121) EL1	WT LL1	myrf-1(ju1121) LL1	WT Mid-L2	myrf-1(ju1121) Mid L2
668.959	965.311	516.049	1055.64	17121	6007.37
719.125	697.555	1183.57	1944.09	16954.3	797.118
680.095	759.753	3302.18	1590.99	15712.5	2869.89
599.646	776.709	574.301	1928.45	16446.9	3707.39
596.433	556.659	1507	1965.59	11895.6	4626.81
711.701	673.957	5275.34	2748.89	18269.9	10532.8
821.112	710.557	690.695	1009.15	21387.6	4554.95
701.192	783.872	1270.1	4887.41	9570.71	6163.61
728.917	661.528	6783.64	262.295	17547	4775.89
684.598	687.204	1296.76	1400.36	20726.9	4833.89
527.295	722.386	874.473	2992.96	22809.1	4736
760.993	640.478	1670.07	2532.53	24181.4	6609.83
565.605	615.472	746.149	1425.83	19204.8	4472.24
665.925	613.267	4005.37	3246.37	23079	5939.37
521.474	614.331	2772.29	2423.72	19590.5	3093.92
626.065
