# Supplementary material for: Essential function of transmembrane transcription factor MYRF in promoting transcription of miRNA lin-4 during C. elegans development
Source: eLife. 2024 Jul 4;12:RP89903. doi: 10.7554/eLife.89903 (PMC11223767; doi:10.7554/eLife.89903)
Supplement: Figure 2—source data 4. [file elife-89903-fig2-data4.xlsx]

## Sheet: Sheet1
WT	pan-1(gk142)
12743	318.432
9161.4	300.911
12093.8	320.588
16245.2	309.487
15984.8	444.657
12606.5	309.669
9371.59	284.028
9150.96	342.662
14293.6	306.358
12255.2	292.789
23692.6	323.033
	317.546
	300.864
	345.507
	323.805
	301.509
