# Supplementary material for: Essential function of transmembrane transcription factor MYRF in promoting transcription of miRNA lin-4 during C. elegans development
Source: eLife. 2024 Jul 4;12:RP89903. doi: 10.7554/eLife.89903 (PMC11223767; doi:10.7554/eLife.89903)
Supplement: Figure 2—source data 5. [file elife-89903-fig2-data5.xlsx]

## Sheet: Sheet1
NE1	NL1	NE2	JE1	JL1	JE2
1	757.32	568.631	2.0135	18.3621	20.9
1	948.615	599.922	61.0214	18.5222	32.7864
1	671.649	367.913	43.0605	40.7861	16.0424
