# Supplementary material for: Essential function of transmembrane transcription factor MYRF in promoting transcription of miRNA lin-4 during C. elegans development
Source: eLife. 2024 Jul 4;12:RP89903. doi: 10.7554/eLife.89903 (PMC11223767; doi:10.7554/eLife.89903)
Supplement: Figure 3—source data 1. [file elife-89903-fig3-data1.xlsx]

## Sheet: Sheet1
	N2
EarlyL1	360.8		401.5		316.2		413.4		282.5		393.8	394.8	372.3	710.8		763.8		706.4		535.5	628.9		538		705.1		607.2		637.5		615		603.4		615.3	511.6		598.8		657.9		314.5		642.8		631.9		504.4
LateL1	447.5		318.4		367.8		487		537.3		241.6		304.9		226.6		237.3		190.4		190.1		160.7		144.1		233.6		223.8		248.4		248		300.8
EarlyL2	278.4		269.4		227.9		243.9		206.3		287.7		261.4		313.8		264.5		263		248.9		263.1		254.1		249.9		236.2		308.3		298.7		276.7		272.4		216.9		254.5		231.4		205.3		216.4		213.4
[truncated: 63 more columns]
