# Supplementary material for: Essential function of transmembrane transcription factor MYRF in promoting transcription of miRNA lin-4 during C. elegans development
Source: eLife. 2024 Jul 4;12:RP89903. doi: 10.7554/eLife.89903 (PMC11223767; doi:10.7554/eLife.89903)
Supplement: Figure 4—source data 1. [file elife-89903-fig4-data1.xlsx]

## Sheet: WT
Distance_(microns)	Gray_Value	Y1	Y2	Y3	Y4	Y5	Y10	Y11	Y12	Y13	Y14	Y15	Y16	Y17	Y18	Y19	Y20	Y21	Y22
0	6065.7	6170.56	6701.93	6145.73	6285.82	5113.35	6817.44	3723.97	5328.6	6240.01	6240.01	5867.95	5638.73	6645.09	6069.86	6621.14	5702.8	6365.7	6365.7
0.1625	6068.16	6102.7	6786.62	6174.6	6424.55	5102.37	6972.81	3794.53	5408.44	6270.74	6270.74	5950.81	5601.44	6590.87	6032.7	6652.14	5746.5	6431.48	6431.48
0.325	6050.27	6112.41	6849.71	6205.61	6355.92	5163.28	7129.3	3770.98	5397.26	6280.15	6280.15	6030.95	5491.99	6610.44	6117.14	6730.65	5838.05	6518.72	6518.72
0.4875	6039.89	6102.37	6794.8	6180.77	6413.46	5133.62	7153.03	3829.76	5434.55	6292.44	6292.44	6070.38	5445.45	6637.01	6109.51	6781.45	5853.3	6580.17	6580.17
0.65	5982.84	6079.35	6914.03	6183.27	6425.3	5119.08	7078.74	3807.08	5435.86	6312.16	6312.16	6160.02	5310.23	6692.58	6069	6771.46	5977.55	6481.9	6481.9
0.8125	5975.94	6085.41	6993.43	6252.77	6447.18	5118.4	6880.12	3870.52	5435.3	6246.01	6246.01	6241.82	5255.86	6767.63	6123.1	6775.01	6010.15	6512.71	6512.71
0.975	5942.35	6037.08	6975.75	6267.21	6509.51	5143.3	6558.96	3933.93	5502.36	6217.81	6217.81	6316.83	5191.25	6726.65	6068.05	6767.06	6005.45	6461.98	6461.98
1.1375	5988.15	6016.47	6991.93	6256.19	6575.34	5100.03	6103	3965.57	5602.05	6160.9	6160.9	6308.44	5073.88	6851.75	6030.83	6761.61	6141.4	6437.36	6437.36
1.3	5986.84	6014.46	6960.8	6227.04	6633.01	5127.36	5781.87	4029.57	5663.71	6062.85	6062.85	6396.55	5054.29	6848.03	6039.4	6794.4	6253.8	6349.48	6349.48
1.4625	5976.37	6049.47	6856.41	6314.31	6671.43	5087.93	5555.08	4015.93	5539.71	6090.09	6090.09	6454.64	4990.68	6864.87	6092.07	6737.89	6227.2	6392.48	6392.48
1.625	5961.66	5982.81	6626.84	6404.48	6682.53	5025.52	5393.68	4065.74	5498.94	6053.36	6053.36	6533.48	4932.73	6879.32	6047.33	6710.82	6364.75	6404.01	6404.01
1.7875	5971.29	5957.34	6529.57	6415.12	6659.49	4981.21	5395.51	4124.67	5431.11	5963.23	5963.23	6612.12	4907.92	6913.23	6061.35	6754.71	6421.95	6453.7	6453.7
1.95	5993.73	5954.79	6495.4	6391.15	6638.33	4948.93	5384.41	4218.28	5473.87	6014.75	6014.75	6605.69	4916.28	6923.48	6105.6	6711.61	6675	6372.06	6372.06
2.1125	5941.25	5944.52	6522.11	6388.2	6629.15	4999.1	5377.56	4252.69	5533.48	6033.45	6033.45	6648.35	4889.03	6980.73	6078.79	6662.35	6606.9	6372.89	6372.89
2.275	5926.16	5925.4	6509.66	6464.4	6554.14	4988.96	5370.59	4248.02	5555.22	6005.23	6005.23	6710.62	4947.29	6956.26	6098.22	6590.03	6625.3	6387.48	6387.48
2.4375	5912.38	5908.04	6466.21	6421.11	6566.9	4982.4	5326.29	4310.21	5624.83	5970.52	5970.52	6735.8	4977.49	6997.77	6038.68	6566.21	6603.85	6346.08	6346.08
2.6	5908.81	5895.39	6557.67	6461.98	6628.21	5012.39	5327.75	4372.75	5579.37	5982.25	5982.25	6805.48	5078.96	6992.47	6064.3	6582.62	6667.9	6337.18	6337.18
2.7625	5924.09	5922.19	6571.37	6487.28	6663.66	4978.72	5420.77	4427.92	5687.94	5994.04	5994.04	6860.68	5120.13	7058.78	6047.68	6679.23	6803.15	6361.18	6361.18
2.925	5943.8	5899.71	6551.5	6488.9	6739.38	4987.52	5381.35	4456.86	5815.35	6007.42	6007.42	6855.77	5143.5	7067.98	6120.82	6645.37	6896.95	6285.74	6285.74
3.0875	5998.79	5887.57	6471.26	6429.96	6763.36	5039.95	5369.14	4467.19	5962.31	6047.33	6047.33	6890.91	5137.06	7100.86	6089.81	6671.65	6971.55	6307.24	6307.24
3.25	5942.78	5903.47	6467.54	6420.48	6710.31	4962.65	5421.51	4512.52	6011.74	6023.9	6023.9	6913.68	5105.27	7149.15	6166.01	6658.76	7085.6	6337.16	6337.16
3.4125	5946.91	5902.14	6416.92	6431.66	6714.07	4996.29	5443.92	4446.62	6111.92	6080.52	6080.52	6914.95	5061.05	7111.91	6288.64	6656.47	7112.45	6373.22	6373.22
3.575	5942.7	5915.1	6345.41	6401.39	6836.83	4949.19	5400.2	4428.45	6173.02	6047.4	6047.4	6820.58	4952.98	7168.27	6355.45	6617.98	7191.05	6348.11	6348.11
3.7375	5890.47	5896.52	6156.31	6384.28	6923.5	4974.05	5484.81	4483.25	6321.27	6071.06	6071.06	6889.17	4939.42	7266.2	6416.51	6652.14	7391.7	6501.71	6501.71
3.9	5947.92	5964.33	6068.77	6359.52	6956.1	4973.81	5513.02	4535.52	6397.04	6120.17	6120.17	6901.52	4925.89	7344.26	6455.17	6695.43	7337.3	6582.48	6582.48
4.0625	5964.36	5973.72	5995.55	6475.46	7007.36	4954.09	5476.89	4423.44	6578.92	6161.26	6161.26	6967.19	4871.81	7312.83	6552.79	6676.12	7484.8	6593.29	6593.29
4.225	5987.19	5983.74	5988.74	6477.17	7017.75	4940.77	5462.35	4435.27	6565.26	6175.29	6175.29	6978.6	4810.89	7236.08	6511.84	6764.88	7372.3	6653.87	6653.87
4.3875	5988.84	5974.3	5940.14	6530.75	6948.95	4919.24	5457.35	4361.21	6590.02	6225.28	6225.28	7067.9	4801.26	7222.46	6498.54	6725.83	7540.55	6641.91	6641.91
4.55	5972.86	5900.52	5912.49	6486.84	6906.34	4798.62	5492.14	4393.85	6715.99	6185.38	6185.38	7133.75	4876.21	7245.37	6523.76	6716.99	7507.95	6636.62	6636.62
4.7125	5942.62	5893.16	5881.9	6426.7	6853.64	4809.58	5514.32	4358.68	6774.28	6247.93	6247.93	7114.97	4893.83	7218.22	6539.77	6744.85	7569.9	6488.75	6488.75
4.875	5907.1	5898.35	5824.59	6405.9	6755.02	4846.52	5472.08	4388.28	6904.06	6232.81	6232.81	7110.72	4955.27	7115.31	6486.17	6684.5	7466.45	6420.55	6420.55
5.0375	5926.12	5917.53	5758.55	6403.96	6726.62	4808.51	5473.37	4352.01	6804.38	6331.1	6331.1	7177.78	5001.25	7123.31	6504.22	6726.53	7400.25	6298.81	6298.81
5.2	5849.26	5956.11	5779.74	6390.8	6687.26	4814.07	5446.65	4327.64	6803.86	6328.19	6328.19	7141.13	5070.9	7085.88	6529.39	6763.25	7396.65	6202.54	6202.54
5.3625	5778.71	5959.7	5814.04	6290.36	6657.92	4805.77	5431.96	4334.51	6661.09	6368.62	6368.62	7143.2	5157.6	7101	6513.14	6813.84	7293.25	6173.65	6173.65
5.525	5802.74	5986.92	5791.79	6234.16	6720.65	4759.92	5466.41	4317.46	6577.64	6371.83	6371.83	7146.77	5239.63	7196.66	6481.05	6895.07	7139.7	6034.9	6034.9
5.6875	5741.27	5918.87	5802.81	6146.49	6836.45	4756.64	5425.84	4365.09	6465.52	6383.52	6383.52	7149.99	5225.59	7165.17	6562.33	6830.4	7044.55	5977.26	5977.26
5.85	5780.89	5960.5	5773.84	6147.25	6823.66	4683.78	5429.48	4385.06	6364.39	6324.08	6324.08	7178.12	5317.62	7132.76	6555.12	6735.65	7075.65	5830.12	5830.12
6.0125	5836.33	5997.97	5789.39	6197.91	6822.53	4629.5	5421.43	4337.13	6343.19	6339.33	6339.33	7156.49	5435.63	7146.57	6548.29	6642.11	6770.6	5819.41	5819.41
6.175	5885.16	5928.86	5836.06	6257.42	6848.71	4605.57	5441.51	4307.08	6348.05	6279.42	6279.42	7106.88	5495.99	7175.98	6600.43	6590.6	6676.8	5721.83	5721.83
6.3375	5963.74	5870.72	5919.48	6312.45	6766.33	4575.67	5428.44	4335	6243	6332.78	6332.78	7075.05	5561.12	7124.17	6692.64	6523.59	6536.3	5634.3	5634.3
6.5	6032.98	5840.35	5918.25	6198.8	6743.91	4562.97	5450.94	4369.65	6096.12	6342.34	6342.34	7028.2	5595.65	7235.31	6815	6384.86	6330.25	5593.39	5593.39
6.6625	6084.92	5807.27	6027.57	6169.7	6707.3	4637.83	5446.82	4307.75	5898.8	6415.17	6415.17	6949.93	5614.46	7254.05	6882.07	6352.38	6253.35	5522.68	5522.68
6.825	6116.38	5802.54	6114.59	6175.5	6629.86	4593.56	5439.98	4314.68	5703.91	6414.51	6414.51	6959.78	5625.89	7173.43	7020.61	6282.07	6224.7	5505.46	5505.46
6.9875	6087.96	5847.2	6184.02	6165.47	6595.11	4588.89	5449.07	4293.61	5572.89	6433.03	6433.03	6936.03	5662.02	7129.73	6992.46	6313.96	6235.55	5512.09	5512.09
7.15	6025.69	5898.61	6171.64	6172.64	6582.17	4538.83	5447.88	4287.07	5466.43	6414.35	6414.35	6927.76	5795.19	7031.68	6984.64	6235.45	6122.8	5441.91	5441.91
7.3125	5946.52	6013.49	6152.1	6213.05	6569.74	4583.76	5479.99	4342.58	5366.1	6374.52	6374.52	6902.47	5921.36	6947.99	6913.86	6180.28	6277.65	5438.94	5438.94
7.475	5919.49	6038.17	6170.33	6209.22	6553.31	4565.53	5445.9	4331.81	5249.69	6341.49	6341.49	6830.01	6033.43	6908.42	6881.28	6197.86	6172.55	5462.87	5462.87
7.6375	5903.87	6113.2	6138.88	6267.56	6562.78	4560.67	5430.63	4298.36	5194.34	6238.85	6238.85	6835.62	6040.95	6795.43	6857.03	6207.16	6133.1	5476.23	5476.23
7.8	5891.41	6103.16	6113.19	6220.41	6554.21	4595.48	5364.09	4327.06	5107.95	6275.44	6275.44	6785.07	6019.02	6686.23	6764.79	6213.51	6186.1	5506.1	5506.1
7.9625	5830.08	6131.72	6094.31	6170.25	6548.05	4605.28	5349.41	4316.06	5087	6198.32	6198.32	6748.32	5961.58	6715.25	6752.53	6241.82	6044.8	5569.88	5569.88
8.125	5881.62	6033.05	6132.91	6165.99	6580.34	4605.65	5333.96	4319.57	5038.41	6250.08	6250.08	6637.34	5857.67	6708.28	6694.54	6175.07	6028.05	5562.13	5562.13
8.2875	5855.18	5992.62	6149.76	6246.01	6695.62	4619.56	5328.45	4312.4	4995.52	6283.76	6283.76	6564.32	5832.66	6630.49	6600.39	6129.42	6046.2	5539.26	5539.26
8.45	5859.2	5999.14	6115.25	6180.25	6670.92	4633.56	5307.03	4369	4950.18	6148.14	6148.14	6479.29	5846.83	6614.96	6588.45	6150.26	5969.45	5516.91	5516.91
8.6125	5856.89	5976.61	6120.06	6123.14	6725.61	4666.14	5270.3	4319.91	4993.84	6029.76	6029.76	6419.4	5812.01	6595.93	6640.59	6214.69	5925.95	5597.07	5597.07
8.775	5891.33	5884.55	6175.94	6115.33	6741.37	4676.58	5275.28	4311.6	4886.08	5957.3	5957.3	6345.16	5756.35	6561.81	6623.62	6189.39	5922.3	5600.21	5600.21
8.9375	5995.01	5880.22	6190.23	6195.66	6694.05	4659.5	5211.19	4308.35	4932.62	5812.67	5812.67	6319.4	5771.28	6626.18	6607.04	6139.59	5955.95	5586.84	5586.84
9.1	6027.9	5903.77	6240	6149.8	6661.8	4706.7	5239.83	4319.54	4965.72	5726.9	5726.9	6349.96	5662.77	6691.14	6654.92	6139.62	6072.25	5599.89	5599.89
9.2625	6111.78	5895.74	6269.98	6094.63	6659.8	4742.32	5134.15	4320.73	5096.39	5762.2	5762.2	6465.55	5541.32	6688.87	6779.14	6137.39	5894.05	5599.8	5599.8
9.425	6147.56	5889.78	6267.22	6134.64	6730.38	4735.89	5067.33	4396.16	5011.85	5712.19	5712.19	6613.08	5486.62	6728.84	6851.72	6107.25	5955.5	5624.62	5624.62
9.5875	6213.31	5868.83	6245.65	6161.73	6735.28	4701.61	4985.6	4399.31	4943.44	5659.24	5659.24	6596.02	5366.7	6698.36	6910.16	6084.17	5929.05	5704.57	5704.57
9.75	6284.24	5974.47	6263.39	6226.15	6722.94	4688.61	4903.56	4540.66	5044.4	5698.57	5698.57	6659.58	5359.5	6733.74	6987.16	6095.67	6021.3	5822.16	5822.16
9.9125	6308.1	5976.02	6257.66	6211.42	6794.22	4694.12	4922.23	4601.98	4950.33	5653.74	5653.74	6639.94	5314.67	6766.36	7033.64	6033.96	5953.25	5898.25	5898.25
10.075	6395.63	6061.36	6290.86	6232.01	6773.78	4737.26	4899.1	4680.14	5025.38	5714.81	5714.81	6538.44	5150.2	6688.73	7086.79	6036.97	5930.65	5998.15	5998.15
10.2375	6391.32	6132.51	6230.13	6245.64	6689.22	4807.86	4857.74	4651.76	5116.77	5707.8	5707.8	6374.02	5152.49	6707.69	7064.19	6003.45	5955.1	5955.64	5955.64
10.4	6430.08	6169.43	6194.35	6286.91	6621.34	4888.16	4845.81	4671.44	5003	5630.43	5630.43	6244.26	5069.27	6675.91	7044.98	6085.11	5946.2	6002.7	6002.7
10.5625	6459.83	6254.14	6097.12	6248.93	6661.88	4980.32	4866.75	4676.36	4984.84	5645.34	5645.34	6135.1	5066.95	6669.9	7039.29	6099.1	5999.25	6089.53	6089.53
10.725	6435.26	6287.99	5937.25	6178.58	6620.03	5028.68	4840.02	4600.92	4982.34	5572.3	5572.3	6081.68	5067.15	6693.55	7028.69	6063.11	6021	6054.14	6054.14
10.8875	6461.25	6283.24	5833.78	6124.77	6515.33	5053.3	4858.45	4547	4787.05	5565.17	5565.17	6068.97	5079.51	6798.43	6950.85	6066.18	6177.3	6160.68	6160.68
11.05	6423.81	6372.81	5814.8	6105.08	6581.05	5155.45	4789.13	4554.45	4700.31	5549.94	5549.94	6068.02	5072.77	6814.9	7014.07	6055.13	6220.9	6236.23	6236.23
11.2125	6429.11	6385.7	5819.11	6124.61	6667.11	5159.83	4785.68	4542.4	4701.78	5574.22	5574.22	5995.5	5089.67	6825.2	7056.08	5979.67	6304.85	6341.6	6341.6
11.375	6400.27	6495.55	5766.72	6182.07	6612.4	5185.49	4822.85	4553.35	4638.45	5591.96	5591.96	5981.57	5097.66	6822.39	6976.22	5981.76	6493.3	6416.79	6416.79
11.5375	6435.11	6441.9	5705.53	6208.3	6656.54	5134.57	4778.23	4588.79	4728.02	5691.06	5691.06	5957.6	5173.21	6851.03	7032.35	5998.9	6578	6533.33	6533.33
11.7	6464.41	6444.85	5706.43	6230.9	6673.46	5188.91	4801.15	4587.42	4697.98	5727.5	5727.5	5908.18	5171.06	6886.38	7147.24	5977.9	6646.2	6612.12	6612.12
11.8625	6475.63	6491.35	5722.39	6218.23	6692.74	5226.03	4787.46	4561.45	4674.62	5705.12	5705.12	5928.45	5220.76	6914.98	7258.11	5973.73	6626.5	6633.66	6633.66
12.025	6593.04	6411.61	5734.33	6092.31	6781.93	5283.77	4750.34	4591.81	4783.53	5744.76	5744.76	5924.35	5324.54	6833.18	7221.94	6068.06	6841.35	6686.46	6686.46
12.1875	6577.45	6383.96	5684.56	6111.09	6837.27	5282.6	4736.84	4624.41	4991.65	5817.32	5817.32	5860.37	5366.04	6847.41	7271.2	6050.76	6834.05	6702.23	6702.23
12.35	6613.18	6396.42	5706.19	6127.68	6812.42	5311.5	4806.36	4670.06	5107.34	5881.05	5881.05	5821.03	5404.87	6827.65	7333.37	6066.33	6838.05	6679.84	6679.84
12.5125	6652.93	6484.19	5697.46	6087.64	6796.39	5260.2	4799.84	4706.36	5143.97	5971.19	5971.19	5982.36	5360.79	6895.35	7341.78	6121.86	6863.2	6683.43	6683.43
12.675	6697.31	6500.83	5807.02	6021.54	6885.63	5238.97	4778.6	4743.69	5266.5	6005.52	6005.52	6050.94	5288.06	6937.34	7416.85	6240.9	7025.6	6670.49	6670.49
12.8375	6685.04	6491.08	5920.01	6080.42	6971.44	5288.64	4823.4	4963.47	5303.63	6096.85	6096.85	6134.55	5235.54	6977.94	7447.76	6398.69	7101.2	6562.34	6562.34
13	6666.55	6530.82	5891.3	6130.15	7000.36	5284.92	4807.25	4966.93	5305.62	6172.99	6172.99	6198.05	5192.43	6941.24	7535.52	6387.24	7147.25	6514.46	6514.46
13.1625	6685.98	6537.35	5851.47	6108.91	7004.7	5349.81	4796.13	4964.24	5360.41	6285.72	6285.72	6178.89	5161.37	6945.3	7533.23	6329.67	7218.25	6481.13	6481.13
13.325	6699.67	6490.75	5903.03	6135.76	6973.36	5369	4751.34	5016.44	5290.58	6422.49	6422.49	6110.85	5040.1	7024.73	7604.03	6287.35	7144.15	6546.26	6546.26
13.4875	6704.35	6574.88	5913.88	6154.33	7017.01	5316.85	4783.55	5021.47	5336.88	6515.29	6515.29	6013.68	4913.92	7061.35	7591.77	6311.89	7247	6600.2	6600.2
13.65	6718.82	6571.9	5893.21	6188.92	7066.12	5323.81	4816.32	4958.04	5286.78	6506.78	6506.78	5827.45	4899.94	7097.56	7603.83	6370.2	7181.55	6527.58	6527.58
13.8125	6675.99	6595.16	5934.44	6170.07	7135.57	5377.74	4856.92	4962.39	5259.58	6448.35	6448.35	5773.36	4871.22	7054.37	7631.32	6259.61	7289.6	6584.12	6584.12
13.975	6630.43	6580.66	5969.16	6218.82	7148.35	5409.74	4900.38	4933.66	5320.6	6460.01	6460.01	5684.34	4884.15	7095.18	7579.42	6325.79	7274.1	6573.34	6573.34
14.1375	6563.23	6633.45	5902.3	6122.83	7174.93	5419.11	5018.51	4895.06	5266.83	6448.9	6448.9	5670.94	4859.69	7115.59	7649.5	6342.2	7248.2	6544.57	6544.57
14.3	6564.41	6612.66	5963.12	6130.86	7192.97	5333.51	5127.85	4920.66	5327.9	6433.6	6433.6	5583.18	4886.87	7098.64	7651.93	6324.93	7346.85	6579.11	6579.11
14.4625	6465.01	6706.4	5956.09	6096.69	7150.55	5377.87	5279.74	4948.51	5223.59	6349.01	6349.01	5584.31	4945.76	7130.84	7665.4	6307.06	7282.55	6640.03	6640.03
14.625	6454.92	6736.83	6016.76	6024.59	7067.13	5252.09	5334.12	4943.68	5207.67	6423.32	6423.32	5547.86	5030.74	7195.44	7695.99	6278.01	7283.75	6636.82	6636.82
14.7875	6371.82	6671.96	6011.97	6092.85	7060.19	5206.5	5277.77	4966.76	5097.17	6449.38	6449.38	5583.17	5007.22	7146.27	7599.9	6239.64	7302.85	6559.03	6559.03
14.95	6398.12	6630.29	6003.44	6046.52	7029.85	5129.55	5266.33	4953.29	5161.8	6536.1	6536.1	5534.14	5088.28	7163.12	7596.97	6268.6	7283.7	6544.87	6544.87
15.1125	6362.91	6534.14	6029.15	6021.04	6983.67	5099.57	5310.45	5021.78	5053.07	6634.59	6634.59	5515.85	5167.16	7122.74	7616.31	6288.93	7195.8	6642.26	6642.26
15.275	6330.74	6515.33	6011.09	6001.61	6917.57	5103.6	5314.57	5001.35	5054.96	6637.73	6637.73	5470.41	5197	7145.98	7639.94	6172.77	7246.7	6585.57	6585.57
15.4375	6347.94	6456.31	6088.23	5961.88	6793.42	4993.9	5276.34	5058.97	5073.42	6744.6	6744.6	5441.14	5229.83	7117.52	7639.51	6211.51	7311.95	6560.46	6560.46
15.6	6388.9	6414.46	6090.96	5946.32	6694.09	5063.22	5318.49	5039.96	5040.93	6803.45	6803.45	5406.02	5211.42	7068.78	7545	6213.29	7297.8	6521.98	6521.98
15.7625	6281.95	6319.55	6082.8	5934.75	6594.25	5013.65	5286.65	5103.66	5066.16	6919.33	6919.33	5374.65	5282.17	7077.47	7498.11	6171.59	7192.25	6475.09	6475.09
15.925	6237.59	6346.08	6130.26	5916.57	6577.08	4986.71	5220.62	5109.93	5066.64	6929.4	6929.4	5357.49	5306.18	7011.85	7473.05	6132.42	7123.6	6498.23	6498.23
16.0875	6252.63	6289.98	6164.38	5935.81	6508.73	4899.93	5187.81	5159.94	5056.37	6911.05	6911.05	5375.76	5269.61	7036.03	7361.1	6142.9	7011.4	6449.14	6449.14
16.25	6168.43	6354.63	6207.71	5912.02	6497.24	4947.84	5151.46	5171.66	5105.74	6923.68	6923.68	5389.4	5250.71	7034.52	7257.68	6182.24	7074.15	6443.8	6443.8
16.4125	6115.39	6320.06	6222.26	5956.98	6459.59	4882.36	5058.52	5158.07	5098.31	6823.45	6823.45	5410.33	5281.41	7064.03	7163.22	6219.17	6996.55	6450.45	6450.45
16.575	6038.5	6327.83	6233.09	5949.88	6416.6	4881.49	5026.85	5162.43	4971.97	6858.09	6858.09	5380.7	5279.14	7006.02	7105.35	6259.23	7067.75	6419.21	6419.21
16.7375	5984.76	6235.9	6117.85	5947.45	6391.23	4800.25	5014.69	5244.76	5043.72	6916.11	6916.11	5458.81	5263.29	7019.4	7058.72	6297.58	7084.1	6440.09	6440.09
16.9	5978.69	6255.78	6112.71	5945.2	6398.62	4780.57	5062.97	5222.26	4990.93	7035.89	7035.89	5465.25	5265.98	6977.76	7023.74	6277.25	7010.8	6393.21	6393.21
17.0625	5894.65	6226.22	5988.06	5975.8	6370.43	4880.01	5041.27	5130.44	5126.27	7025.2	7025.2	5404.08	5229.97	7017.67	6974.23	6262.54	6960.7	6404.62	6404.62
17.225	5936.9	6179.93	6038.08	5967.61	6286.83		5080.29	5155.17	5047.87	7077.26	7077.26	5451.81	5247.77	6952.08	6880.77	6313.42	7021.1	6485.65	6485.65
17.3875	5878.05	6092.51	6112.47	5936.12	6216.9		5181.49	5102.96	4998.17	7101.33	7101.33	5455.14	5221.51	6986.35	6908.56	6397.83	7082.6	6497.38	6497.38
17.55	5805.48	6030.24	6157.54	5823.19	6137.6		5187.28	5084.13	5074.36	7115.17	7115.17	5450.24	5204.41	6926.62	6875.33	6389.21	7059.7	6436.88	6436.88
17.7125	5764.67	6009.88	6171.27	5849.99	6134.52		5146.29	5067.03	4961.59	7066.45	7066.45	5331.64	5260.46	6904.37	6831.63	6391.62	6915.8	6432.91	6432.91
17.875	5698.09	6031.86	6077.6	5840.15	6072.98		5137.44	5077.54	4998.63	6969.02	6969.02	5409.88	5317.83	6872.73	6719.97	6435.21	7010.35	6464.78	6464.78
18.0375	5647.88	5899.37	6104.68	5778.84	5976.98		5091.07	5055.6	5069.98	6840.5	6840.5	5441.72	5432.76	6911.66	6597.33	6400.53	6932.55	6467.87	6467.87
18.2	5519.67	5899.94	6039.99	5734.1			5109.72	5026.83	5007.89	6764.56	6764.56	5447.17	5397.89	6952.75	6503.37	6308.52	6866.15	6430.77	6430.77
18.3625	5455.24	5816.05	6140.96	5724.78			5089.49	4995.85	4994.92	6703.66	6703.66	5435.53	5408.2	6967.12	6385.8	6311.25	6873.4	6459.49	6459.49
18.525	5393.8	5753.33	6210.55	5625.22			5019.58	4953.44	4899.31	6650.06	6650.06	5420.44	5514.96	6944.92	6348.61	6269.77	6736	6488.67	6488.67
18.6875	5298.81	5670.4	6310.92	5575.17			5072.73	4958.8	4905.49	6628.7	6628.7	5418.74	5480.45	6968.19	6277.47	6306.4	6857	6548.72	6548.72
18.85	5230.89	5612.35	6367.24	5493.13			5128.73	4914.9	4944.37	6605.63	6605.63	5450.83	5492.11	6964.98	6227.28	6307.96	6723.35	6563.27	6563.27
19.0125	5239.31	5534.68	6360.92	5456.86			5092.04	4856.13	4894.2	6669.47	6669.47	5405.63	5476.16	7089.18	6133.61	6312.35	6667.3
19.175	5127.23	5455.76	6288.5	5374.81			5125.13	4832.03	4836.21	6699.2	6699.2	5372.83	5467.54	7022.96	6000.33	6369.99	6662.3
19.3375	5075.15	5346.22		5366.93			5087.95	4811.39	4787.91	6682.32	6682.32	5378.82	5519.29	7036.96	5905.31	6346.4	6588.25
19.5				5325.95			5026.16	4772.18	4891.15	6671.2	6671.2	5323	5517.49	7137.57	5856.56	6395.92	6584.3
19.6625							5083.71	4766.68	4863.27	6722.6	6722.6	5283.14	5483	7165.23	5717.64	6430.04
19.825							5198.2	4729.2	4851.25	6782.32	6782.32	5205.68	5511.03	7237.8	5656.5	6480.18
19.9875							5166.24	4713.22	4800.29	6758.37	6758.37	5211.4	5551.76	7205.95	5566.61	6537.79
20.15							5165.46	4759.5	4806.48	6744.38	6744.38	5164.31	5496.71	7278.82	5450.44	6562.17
20.3125							5220.62	4761.14	4859.44	6724.52	6724.52	5160.62	5455.7	7251.13	5417.22	6614.6
20.475							5224.09	4769.36	4817.77	6695.69	6695.69	5215.05	5359.65	7266.6	5358.48	6619.18
20.6375							5228.87	4757.09	4811.37	6634.16	6634.16	5161.66	5328.98	7368.99	5286.01	6639.67
20.8							5199.72	4834.59	4840.34	6565.31	6565.31	5108.94	5339.45	7443.28	5294.49	6689.18
20.9625							5257.77	4859.73	4860.23	6585.98	6585.98	5086.01	5138.32	7508.52	5201.17	6701.81
21.125							5308.37	4868.11	4756.9	6609.18	6609.18	5067.08	5094.02	7593.08	5150.18	6759.05
21.2875							5240.49	4862.49	4834.85	6651.81	6651.81	5096.37	5036.72	7706.07	5162.9	6695.94
21.45							5229.97	4876.48	4853.65	6625.74	6625.74	5111.38	5043.48	7727.95	5081	6733.14
21.6125							5257.98	4925.99	4828.1	6685.43	6685.43	5121.04	4956.56	7811.32	5130.83	6747.36
21.775							5224.25	5018.68	4845.03	6722.16	6722.16	5201.31	4865.09	7939.06	5018.26	6710.78
21.9375							5269.92	5010.49	4870.33	6644.1	6644.1	5152.58	4934.96	8063.59	5029.83	6649.31
22.1							5296.56	5014.27		6692.48	6692.48	5194.19	4902.94
22.2625							5413.06	5047.46		6688.71	6688.71	5243.81	4868.4
22.425							5348.37	5163.94		6726.38	6726.38	5259.12	4833.64
22.5875							5381.6	5207.9		6656.94	6656.94	5201.4	4913.43
22.75							5399.38	5235.36		6652.84	6652.84	5314.34	4889.15
22.9125							5374.7	5281.27		6617.86	6617.86	5332.75	4889.76
23.075							5365.5	5368.64		6640.44	6640.44	5278.73	4849.16
23.2375							5404.6	5357.1		6628.2	6628.2	5341.74	4882.98
23.4							5386.96	5438.84		6626.02	6626.02	5297.77	4858.07
23.5625							5423.48	5550.78		6691.19	6691.19	5284.09	4858.69
							5408.9	5596.88		6748.71	6748.71	5309.91	4843.07
							5377.98	5675.28		6864	6864	5317.34	4912.7
							5386.62	5722.4		6884.95	6884.95	5342.04	4940.14
							5316.22	5797.86		6775.28	6775.28	5333.34	4906.11
							5353.76	5804.62		6589.96	6589.96	5435.15	4895.38
							5382.91
							5370.89
							5381.16
							5336.9
							5303.12
							5307.84
							5482.27
							5541.55
							5548.67

## Sheet: epidermis knock-out MYRF
Distance_(microns)		Gray_Value	Y1	Y2	Y3	Y4	Y5	Y6	Y8	Y9		Y12	Y13	Y15	Y16
0	2.1125	3797.74	4140.85	4140.85	6204.26	4786.75	4353.68	3928.17	4022.35	3765.66	3874.23	3787.05	3493.57	3098.46	3765.66	4151.44
0.1625	2.275	3823.39	4049.62	4049.62	6313.57	4699.9	4659.81	4125.68	4051.11	3718.22	3852.5	3861.79	3455.92	3078.2	3718.22	4125.68
0.325	2.4375	3875.58	3833.84	3833.84	6381.13	4663.74	4851.98	4320.62	4046.26	3752.25	3796.79	3821.67	3407.36	3127.17	3752.25	4045
0.4875	2.6	3920.03	3674.41	3674.41	6377.72	4584.53	5069.12	4469.35	3985.4	3743.43	3728.6	3810.77	3417.37	3194.09	3743.43	3993.3
0.65	2.7625	3944.7	3513.82	3513.82	6444.47	4525.96	5123.67	4691.63	3961.44	3749.16	3627.74	3816.66	3331.14	3219.59	3749.16	3994.26
0.8125	2.925	3924.02	3359.92	3359.92	6427.98	4464.77	5149.58	4849.41	3960.84	3705.22	3601.62	3787.95	3275.88	3201.24	3705.22	3957.11
0.975	3.0875	3954.84	3206.62	3206.62	6335.07	4412.62	5074.33	5050.19	3851.57	3792.42	3450.49	3766.71	3179.74	3171.72	3792.42	3821.43
1.1375	3.25	4013.31	3168.59	3168.59	6298.41	4298.21	5016.54	5206.42	3677.17	3834.3	3442.71	3751.01	3161.75	3110.95	3834.3	3732.72
1.3	3.4125	4052.39	3065.57	3065.57	6178.84	4246.45	5017.7	5265.12	3642.84	3779.72	3355.07	3620.57	3067.15	3017.43	3779.72	3587.73
1.4625	3.575	4058.2	3049.69	3049.69	6043.48	4198.91	5007.32	5343.03	3589.81	3798.87	3273.99	3518.92	2976.05	2921.88	3798.87	3481.76
1.625	3.7375	4034.11	3043.75	3043.75	5842.46	4121.38	5023.02	5220.44	3450.01	3837.64	3252.19	3500.72	2924.08	2862.44	3837.64	3455.74
1.7875	3.9	3897.04	3002.42	3002.42	5666.03	4068.89	5035.21	5063.97	3249.92	3727.85	3234.28	3386.36	2908.94	2747.47	3727.85	3464.39
1.95	4.0625	3809.04	2957.33	2957.33	5407.66	4043.23	5042.63	4893.23	3110.94	3731.31	3179.79	3273.28	2892.57	2593.08	3731.31	3453.96
2.1125	4.225	3677.39	2858.22	2858.22	5176.98	3921.29	5049.88	4791.26	2959.14	3707.75	3210.67	3218.68	2820.35	2485.3	3707.75	3443.74
2.275	4.3875	3598.42	2770.42	2770.42	4964.1	3818.73	4933.8	4607.14	2835.59	3740.11	3169.69	3138.43	2762.82	2472.19	3740.11	3471.27
2.4375	4.55	3471.32	2638.88	2638.88	4699.39	3761.49	4770.4	4366.45	2752.32	3707.97	3115.99	3019.19	2732.15	2399.19	3707.97	3517.81
2.6	4.7125	3478.13	2559.55	2559.55	4538.87	3684.29	4651.57	4132.16	2723.61	3663.77	3048.33	2933.82	2696.59	2399.09	3663.77	3638.12
2.7625	4.875	3455.45	2496.36	2496.36	4313.62	3528.47	4531.48	3902.7	2636.88	3637.16	3052.76	2839.3	2623.77	2405.81	3637.16	3635.23
2.925	5.0375	3320.01	2498	2498	4060.86	3440.12	4347.11	3684.28	2650.72	3559.41	3034.88	2814.37	2578.11	2454.87	3559.41	3591.6
3.0875	5.2	3307.8	2531.68	2531.68	3877.17	3379.67	4100.47	3422.01	2629.41	3506.29	3006.86	2740.18	2611.65	2430.85	3506.29	3523.86
3.25	5.3625	3304.16	2563.31	2563.31	3722.57	3360.73	3878.82	3230.19	2593.08	3487.1	2929.08	2703.62	2554.87	2403.98	3487.1	3423.09
3.4125	5.525	3292.76	2626.12	2626.12	3559.05	3376.37	3637.44	2980.23	2545.27	3365.9	2897.51	2734.28	2552.48	2422.11	3365.9	3409.38
3.575	5.6875	3216.24	2641.84	2641.84	3328.45	3368.24	3515.03	2778.8	2518.76	3325.45	2840.6	2702.79	2492.94	2415.98	3325.45	3292.18
3.7375	5.85	3111.67	2621.37	2621.37	3110.16	3335.09	3427.17	2610.41	2568.53	3264.66	2814.34	2665.05	2477.96	2400.67	3264.66	3268.58
3.9	6.0125	3050.61	2545.44	2545.44	2977.33	3323.55	3441.13	2517.53	2552.34	3165.87	2800.56	2613.27	2433.29	2380.78	3165.87	3248.86
4.0625	6.175	3034.67	2519.92	2519.92	2909.62	3216.79	3419.24	2497.24	2565.28	3047.11	2794.83	2555.51	2435.34	2402.32	3047.11	3269.31
4.225	6.3375	2927.89	2427.08	2427.08	2863.29	3176.92	3444	2477.91	2520.35	3020.18	2772.41	2568.48	2427.63	2441.4	3020.18	3189.23
4.3875	6.5	2883.95	2367.24	2367.24	2799.12	3118.31	3563.26	2454.93	2461.74	2899.31	2767.88	2545.12	2373.64	2445.91	2899.31	3252.5
4.55	6.6625	2908.27	2312.68	2312.68	2861.36	3024.52	3577.72	2398.73	2472.77	2798.27	2717.95	2518.13	2365.56	2391.79	2798.27	3266.55
4.7125	6.825	2949.1	2332.6	2332.6	2881.95	2941.31	3638.99	2325.59	2446.7	2709.64	2708.96	2457.28	2331.06	2367.55	2709.64	3348.36
4.875	6.9875	2977.41	2319.15	2319.15	2813.66	2844.13	3592.07	2274.74	2454.26	2556.49	2646.84	2405.01	2332.08	2344.99	2556.49	3458.91
5.0375	7.15	3066.68	2337.51	2337.51	2815.53	2784.23	3470.29	2264.56	2383.67	2498.92	2654.33	2384.88	2350.68	2295.65	2498.92	3441.69
5.2	7.3125	3169.92	2332.84	2332.84	2774.41	2767.09	3350.31	2268.75	2373.77	2422.77	2532.1	2336.71	2326.82	2291.36	2422.77	3431.7
5.3625	7.475	3177.99	2337.44	2337.44	2693.31	2785.65	3240.97	2235.11	2404.2	2342.38	2511.58	2342.28	2311.07	2254.94	2342.38	3347.25
5.525	7.6375	3082.2	2299.91	2299.91	2696.64	2740.57	3194.1	2193.08	2354.78	2320.45	2531.97	2322.77	2325.58	2214.1	2320.45	3283.74
5.6875	7.8	2947.29	2318.15	2318.15	2691.61	2635.26	3149.79	2191.22	2352.04	2281.99	2462.11	2333.08	2319.78	2212.62	2281.99	3236.88
5.85	7.9625	2756.99	2306.94	2306.94	2597.69	2653.67	3108.96	2192.02	2357.71	2257.14	2433.12	2299.25	2328.28	2242.98	2257.14	3165.4
6.0125	8.125	2635.32	2330.6	2330.6	2532.8	2566.75	3069.64	2217.81	2325	2226.85	2433.18	2333.39	2364.33	2235.68	2226.85	3115.3
6.175	8.2875	2513.38	2283.44	2283.44	2475.3	2490.91	3109.04	2188.61	2330.12	2218.24	2400.89	2332.36	2364.26	2198.94	2218.24	3161.41
6.3375	8.45	2424.78	2253.65	2253.65	2379.76	2454.04	3145.35	2179.28	2330.76	2268.68	2379.36	2253.14	2369.44	2207.64	2268.68	3136.13
6.5	8.6125	2378.05	2226.7	2226.7	2341.15	2422.54	3146.79	2167.46	2272.48	2289.43	2373.27	2285.05	2415.89	2196.97	2289.43	3166.99
6.6625	8.775	2352.88	2230.31	2230.31	2348.35	2399.97	3197.52	2167.93	2281.22	2291.45	2365.94	2314.91	2463.43	2189.05	2291.45	3172.81
6.825	8.9375	2308.92	2194.07	2194.07	2363.9	2390.78	3138.35	2200.1	2280.57	2316.17	2385	2325.02	2528.5	2156.79	2316.17	3201.49
6.9875	9.1	2334.81	2181.22	2181.22	2358.66	2362.45	3152.3	2228.19	2294.91	2345.62	2414.15	2286.51	2624.72	2159.36	2345.62	3178.12
7.15	9.2625	2339.62	2166.88	2166.88	2422.18	2350.84	3143.86	2212.46	2294.57	2324.2	2395.12	2314.78	2669.31	2097.25	2324.2	3168.91
7.3125	9.425	2312.81	2148.61	2148.61	2406.94	2348.56	3105.61	2237.49	2287.44	2306.04	2426.46	2349.19	2694.47	2099.69	2306.04	3126.39
7.475	9.5875	2345.09	2170.65	2170.65	2489.78	2345.31	3156	2254.34	2275.27	2327.42	2488.86	2412.33	2769.06	2055.77	2327.42	3089.05
7.6375	9.75	2381.7	2152.16	2152.16	2526.5	2357.64	3105.08	2271.48	2385.8	2332.48	2646.03	2529.61	2890.17	2045.62	2332.48	3086.37
7.8	9.9125	2420.68	2105.76	2105.76	2527.34	2379.28	3221.26	2316.07	2412.1	2337.84	2824.82	2702.03	2963.93	2047.41	2337.84	3133.42
7.9625	10.075	2495.01	2120.52	2120.52	2540.66	2436.95	3164.14	2360.42	2462.53	2370.72	3034.78	2848.37	3064.07	2059.12	2370.72	3261.79
8.125	10.2375	2620.83	2154.41	2154.41	2657.86	2608.31	3139.16	2543.04	2559.88	2427.51	3162.51	2892.29	3128.19	2097.47	2427.51	3312.19
8.2875	10.4	2719.99	2157.19	2157.19	2793.47	2830.02	3166	2759.59	2641.86	2458.54	3321.89	2877.07	3114.93	2115.47	2458.54	3536.26
8.45	10.5625	2807.26	2160.45	2160.45	2880.74	2925.05	3254.64	2913	2694.89	2622.77	3449.51	2871.46	3251.75	2147.44	2622.77	3709.38
8.6125	10.725	2898.91	2196.09	2196.09	2906.43	2990.95	3288.56	2999.94	2703.63	2692.7	3505.48	2876.38	3224	2208.25	2692.7	3779.39
8.775	10.8875	2962.23	2264.02	2264.02	2967.86	3000	3351.89	3084.15	2658.36	2819.4	3614.17	2901.78	3245.97	2236.05	2819.4	3873.8
8.9375	11.05	3014.55	2291.1	2291.1	2983.33	2959.78	3463.28	3170.05	2643.32	2866.69	3671.21	2942.3	3222.02	2261.89	2866.69	3883.37
9.1	11.2125	3079.62	2364.93	2364.93	2972.33	2959.23	3422.09	3119.13	2683.26	2891.96	3692.93	2939.69	3251.36	2221.83	2891.96	3915.03
9.2625	11.375	2994.62	2423.88	2423.88	2907.4	2963.65	3415.5	3133.2	2683.29	2827.22	3723.4	2893.32	3238.5	2177.94	2827.22	3916.08
9.425	11.5375	2998.89	2524.98	2524.98	2888.09	2965.87	3338.78	3041.69	2697.14	2833.23	3688.81	2786	3237.72	2170.34	2833.23	3901.09
9.5875	11.7	3023.09	2683.63	2683.63	2855.51	3068.1	3301.2	3035.9	2692.03	2913.39	3636.73	2659.46	3252.2	2168.6	2913.39	3821.46
9.75	11.8625	2953.52	2765.43	2765.43	2839.53	3067.35	3243.72	3054.05	2694.2	2969.41	3606.55	2549.64	3217.76	2114.02	2969.41	3735.9
9.9125	12.025	2862.17	2869.83	2869.83	2765.68	3051.29	3075.76	2949.53	2686.59	2902.48	3589.1	2444.11	3111.84	2076.35	2902.48	3644.64
10.075	12.1875	2799.22	2922.86	2922.86	2698.69	3002.53	2975.1	2850.52	2605.79	2861.09	3555.42	2388.6	3141.99	2019.62	2861.09	3520.82
10.2375	12.35	2815.41	2933.26	2933.26	2538.46	2929.09	2922.32	2645.57	2513.6	2646.74	3449.95	2325.14	3149.21	1989.34	2646.74	3325.09
10.4	12.5125	2777.49	2894.81	2894.81	2377.75	2756.34	2909.85	2479.65	2438.76	2507.15	3396.35	2325.68	3052.05	1982.09	2507.15	3127.89
10.5625	12.675	2760.25	2858.04	2858.04	2202.34	2741.76	2920.91	2444.45	2460.99	2418.62	3255.62	2327.46	2960.83	2005.77	2418.62	2945.34
10.725	12.8375	2698.58	2883.05	2883.05	2124.93	2625.41	2992.53	2466.16	2461.69	2367.82	3083.86	2331.43	2927.33	1985.91	2367.82	2848.85
10.8875	13	2634.07	2790.14	2790.14	2019.18	2483.87	2996.01	2414.45	2488.03	2315.05	2842.67	2354.68	2832.16	1934.55	2315.05	2820.03
11.05	13.1625	2649.25	2699.7	2699.7	2017.57	2343.95	3028.52	2452.46	2517.91	2327.26	2645.39	2380.12	2837.22	1958.34	2327.26	2859.65
11.2125	13.325	2658.88	2539.86	2539.86	1988.1	2272.97	2974.04	2497.51	2509.86	2336.49	2523.71	2339.15	2786.83	1977.28	2336.49	2917.23
11.375	13.4875	2689.94	2443.72	2443.72	1966.79	2293.34	2952.63	2513.44	2503.69	2336.78	2478.66	2342.74	2781.34	1959.06	2336.78	2969.11
11.5375	13.65	2748.72	2378.41	2378.41	1955.64	2261.59	2941.43	2588.56	2514.24	2340.2	2475.26	2329.69	2800.2	1973	2340.2	2956.6
11.7	13.8125	2937.99	2337.88	2337.88	1968.18	2264.74	3025.75	2574.34	2567.08	2367.07	2475.89	2349.02	2799.58	1984.11	2367.07	3012.11
11.8625	13.975	3029.84	2290.73	2290.73	1978.71	2267.98	3059.72	2605.98	2565.26	2398.82	2477.96	2322.44	2795.5	1989.37	2398.82	3036.54
12.025	14.1375	3158.84	2295.61	2295.61	1969.67	2300.24	3133.78	2609.31	2580.93	2379.24	2543.74	2346.34	2788.72	2024.43	2379.24	3053.43
12.1875	14.3	3210.84	2288.01	2288.01	1990.61	2351.04	3137.01	2576.96	2644.05	2395.16	2536.21	2343.62	2852.2	2002.75	2395.16	3117.54
12.35	14.4625	3247.61	2300.97	2300.97	1986.28	2353.01	3290.45	2583.27	2632.43	2439	2532.49	2354.36	2861.5	1995.69	2439	3150.22
12.5125	14.625	3272.25	2313.57	2313.57	1960.38	2381.15	3333.88	2648.67	2552.1	2404.48	2567.07	2354.01	2898.17	2014.02	2404.48	3135.69
12.675	14.7875	3182.03	2332.46	2332.46	1928.51	2404.96	3458.45	2630.61	2518.84	2470.86	2632.76	2382.62	2957.39	2039.88	2470.86	3171.91
12.8375	14.95	3108.12	2335.59	2335.59	1903.94	2432.3	3514.77	2627.18	2552.96	2491.05	2663.27	2395.78	3031.26	2046.15	2491.05	3244.32
13	15.1125	3013.68	2354.58	2354.58	1973.11	2448.87	3477.84	2640.17	2555.07	2495.86	2672.61	2417.07	3123.83	2080.35	2495.86	3276.74
13.1625	15.275	2908.54	2341.57	2341.57	2001.18	2507.25	3454.6	2636.19	2515.83	2500.78	2661.93	2495.91	3123.72	2092.65	2500.78	3261.32
13.325	15.4375	2795.97	2397.76	2397.76	2019.18	2501.95	3389.18	2689.17	2503.66	2508.86	2587.74	2492.71	3144.97	2135.65	2508.86	3318.18
13.4875	15.6	2751.37	2400.17	2400.17	2046.23	2479.76	3386.96	2726.29	2604.05	2522.03	2557.74	2482.45	3147.42	2098.38	2522.03	3386.44
13.65	15.7625	2716.72	2469.46	2469.46	2109.03	2460.59	3399.57	2831.16	2751.47	2491.16	2514.19	2485.74	3141.63	2097.92	2491.16	3494.86
13.8125	15.925	2662.73	2497.31	2497.31	2153.74	2446.63	3463.2	2941.52	2921.2	2546.97	2476.19	2490.37	3162.78	2118.57	2546.97	3601.61
13.975	16.0875	2698.15	2509.78	2509.78	2195.83	2459.59	3521.09	3036.55	3066.59	2650.6	2475.34	2514.71	3176.55	2121.45	2650.6	3668.15
14.1375	16.25	2671.39	2498.48	2498.48	2229.83	2475.15	3635.82	3201.28	3136.43	2756.08	2434.49	2529.69	3204.99	2120.36	2756.08	3741.53
14.3	16.4125	2682.57	2492.68	2492.68	2245.42	2493.88	3756.05	3310.84	3156.64	2874.52	2490.99	2584.97	3170.93	2176.21	2874.52	3829.19
14.4625	16.575	2825.78	2531.33	2531.33	2275.66	2504.52	3949.45	3446.66	3238.25	2972.38	2483.72	2585.4	3281.38	2205.53	2972.38	3843.45
14.625	16.7375	2956.06	2500.39	2500.39	2293.7	2545.3	4103.9	3739.07	3250.55	3039.3	2452.93	2635.41	3378.54	2264.94	3039.3	3882.81
14.7875	16.9	3039	2579.38	2579.38	2329.24	2569.52	4300.14	4015.46	3215.47	3113.39	2555.57	2691.63	3504.3	2269.44	3113.39	3922.18
14.95	17.0625	3120.95	2579.1	2579.1	2349.18	2654.06	4487.24	4427.95	3222.93	3192.7	2598.73	2656.73	3697.07	2314.35	3192.7	3963.85
15.1125	17.225	3161.66	2598.5	2598.5	2342.2	2638.13	4673.73	4848.36	3279.56	3316.14	2704.58	2712.18	3886.04	2374.81	3316.14	4152.56
15.275	17.3875	3232.16	2615.11	2615.11	2420.98	2824.14	4895.87	5338.38	3332.89	3427.62	2809.17	2730.08	4062.26	2434.86	3427.62	4348.77
15.4375	17.55	3348.87	2681.83	2681.83	2489.1	3038.87	5133.8	5829	3467.65	3549.86	2863.75	2812.95	4176.72	2488.16	3549.86	4487.6
15.6	17.7125	3323.64	2798.25	2798.25	2625.7	3338.59	5288.2	6094.87	3579.66	3671.74	2939.16	2879.85	4285.34	2493.87	3671.74	4662.57
15.7625	17.875	3400.66	2919.01	2919.01	2723.84	3599.84	5434.51	6405.01	3695.32	3838.66	2980.24	2969.92	4377.95	2532.38	3838.66	4712.11
15.925	18.0375	3344.65	3094.6	3094.6	2829	3860.62	5620.34	6670.12	3858.2	3969.4	3088.78	3003.6	4361.75	2502.53	3969.4	4760.21
16.0875	18.2	3282.37	3248.67	3248.67	3035.03	4015.18	5725.64	6893.09	4053.81	4093.65	3184.51	2952.6	4463.96	2542.69	4093.65	4749.52
16.25	18.3625	3262.59	3389.09	3389.09	3198.34	4235.16	5855.2	7035.25	4230.52	4299.8	3302.74	2907.4	4538.43	2502.52	4299.8	4742.38
16.4125	18.525	3294.76	3503.88	3503.88	3441.79	4409.57	5951.4	7069.46	4441.14	4532.95	3329.68	2982.06	4500.51	2527.18	4532.95	4699.92
16.575	18.6875	3339.76	3569.77	3569.77	3618.06	4524.5	6007.94	7192	4592.39	4619.33	3355.83	2988.18	4503.68	2592.17	4619.33	4745.65
16.7375	18.85	3234.61	3659.65	3659.65	3791.45	4645.28	6105.84	7271.4	4581.04	4770.51	3410.83	2959.47	4478.52	2548.59	4770.51	4800.16
16.9	19.0125	3109	3726.42	3726.42	3926.3	4720.61	6120.49	7146.02	4568.87	4902.21	3472.6	2919.97	4490.16	2499.43	4902.21	4852.64
17.0625	19.175	2758.8	3794.3	3794.3	4091.9	4771.17	6206.58	7105.56	4510.5	4848.73	3520.53	2859.96	4472.85	2487.77	4848.73	4800.83
17.225	19.3375	2416.14	3804.47	3804.47	4082.98	4840.67	6233.55	6872.53	4387.81	4748.79	3613.94	2785.83	4424.24	2474.22	4748.79	4821.56
17.3875	19.5	2187.26	3860.78	3860.78	4167.17	4937.58	6330.06	6553.96	4336.44	4546.69	3645.51	2668.04	4398.24	2510.61	4546.69	4857.58
17.55	19.6625	2060	3959.06	3959.06	4282.5	4989.6	6554.29	6230.94	4163.76	3780.56	3747.18	2524.48	4377.26	2514.28	3780.56	4766.74
17.7125	19.825	2094.37	3984.07	3984.07	4357.43	5024.68	6688.7	5845.29	4025.16	3350.47	3740.8	2401.83	4430.85	2541.25	3350.47	4802.04
17.875	19.9875	2104.17	4054.57	4054.57	4393.73	5188.36	6798.05	5631.73	3838.82	2497.35	3812.92	2292.71	4410.52	2593.26	2497.35	4811.16
18.0375	20.15	2123.96	4149.53	4149.53	4556.29	5179.42	7061.18	5346.3	3591.68	2165.45	3836.8	2221.83	4345.09	2585.05	2165.45	4792.67
18.2	20.3125	2187.28	4115.49	4115.49	4693.01	5244.58	7468.7	5201.18	3438.38	1658.57	3852.82	2142.76	4317.74	2573.77	1658.57	4795.83
18.3625	20.475	2243.88	4088.87	4088.87	4686.9	5271.74	7752.32	5097.96	3346.81	1594.45	3884.2		4343.41	2544.19	1594.45	4734.56
18.525	20.6375	2280.27	4029.82	4029.82	4751.47	5377.28	7811.71	4990.57	3246.02	1572.4	3851.56			2465.7	1572.4	4701.81
18.6875	20.8	2316.73	3836.74	3836.74	4785.29	5432.81	7850.46	4918.19	3182.96	1328.65	3815.38			2424.76	1328.65	4663.46
18.85	20.9625	2379.73	3505.52	3505.52	4819.29	5462.3	7757.83	4855.94	3148.09	1331.64	3849.91			2378.89	1331.64	4606.81
19.0125	21.125	2507.53	3159.6	3159.6	4835.35	5493.29	7699.59	4776.32	3063.1	1121.65	3853.28			2310.05	1121.65	4584.26
19.175	21.2875	2585.91	2811.61	2811.61	4949.45	5470.02	7580.36	4565	2995.51	1136.36	3855.68			2288.26	1136.36	4540.7
19.3375	21.45	2682.55	2725.49	2725.49	5110.6	5464.3	7414.55	4394.62	2929.76	871.258	3895.95			2230.05	871.258	4412.88
19.5	21.6125	2834.73	2964.54	2964.54	5202.45	5383.93	7266.7	4252.29	2916.63	868.67	3939.96			2161.14	868.67	4283.71
19.6625	21.775	2957.35	3339.39	3339.39	5268.79	5186.85	7150.85	4190.8	2897.22	626.06	4008.95			2118.04	626.06	4215.6
19.825	21.9375	3176.74	3627.66	3627.66	5384.94	5027.38	6970.61	4220.76	2899.75	588.182	4034.84			2020.77	588.182	4127.31
19.9875	22.1	3412.04	3832.37	3832.37	5612.15	4900.76	6762.97	4384.21	2845.49	601.161	4084.08			1958.48	601.161	4099.17
20.15	22.2625	3563.78	3968	3968	5814.84	4690.84	6461.72	4534.88	2857.88	410.156				1917.37	410.156	3989.66
20.3125	22.425	3759.5	4049.16	4049.16	5912.34	4570.1	6251.8	4679.91	2886.09	409.253				1956.69	409.253	3940.74
20.475	22.5875	3998.86	4156.53	4156.53	6020.47	4426.72	5988.91	4731.46	3005.74	218.956				1971.85	218.956	3899.37
20.6375	22.75	4316.55	4168.2	4168.2	6061.56	4264.25	5791.35	4712.67	3066.76	224.209				1984.01	224.209
20.8	22.9125	4587.19	4145.85	4145.85	6114.96	4162.39	5590.66	4714.99	3197.97	0				2005.38	0
20.9625	23.075		4194.64	4194.64	6238.84	4116.05	5454.59	4638.52	3273.6	0				2024.87	0
21.125	23.2375		4204.04	4204.04	6234.1	3914.84	5262.74	4565.02	3276.02	0					0
21.2875	23.4						4925.45
21.45	23.5625						4560.5
21.6125							4375.51
21.775							4235.61
21.9375							4171.45
22.1
22.2625
22.425
22.5875
22.75
22.9125
23.075
23.2375
23.4
23.5625
