# Supplementary material for: Essential function of transmembrane transcription factor MYRF in promoting transcription of miRNA lin-4 during C. elegans development
Source: eLife. 2024 Jul 4;12:RP89903. doi: 10.7554/eLife.89903 (PMC11223767; doi:10.7554/eLife.89903)
Supplement: Figure 4—source data 2. [file elife-89903-fig4-data2.xlsx]

## Sheet: Sheet1
	L1	L2	L3	L4	total number of animals
N2 plate1	0	0	2.78746	97.2125	287
mIn1/ybq98	0	0	5.41516	94.5848	277
ybq98	0	0	5	95	140
