# Supplementary material for: Essential function of transmembrane transcription factor MYRF in promoting transcription of miRNA lin-4 during C. elegans development
Source: eLife. 2024 Jul 4;12:RP89903. doi: 10.7554/eLife.89903 (PMC11223767; doi:10.7554/eLife.89903)
Supplement: Figure 5—source data 1. [file elife-89903-fig5-data1.xlsx]

## Sheet: pharynx
WT EL1	myrf-1(syb1313) EL1	WT LL1	myrf-1(syb1313) LL1
193.242	876.109	30439.7	5243.54
217.312	579.16	25109.4	2389.83
332.458	636.782	23074.5	2406.21
190.509	889.551	18583.4	3225.62
191.604	1388.66	16188.6	3311.9
161.577	1083.32	34695.4
173.987

## Sheet: neurons
WT EL1	myrf-1(syb1313) EL1	WT LL1	myrf-1(syb1313) LL1
96.099	8575.48	11482.4	26910.9
118.094	14321	14190.7	18222.2
155.951	14685.1	12340.4	16176.4
118.185	16614	11439.9	16703.5
108.455	10899.9	7205.73	13808.1
110.377	10799.9	11467.1
115.529
