# Supplementary material for: Essential function of transmembrane transcription factor MYRF in promoting transcription of miRNA lin-4 during C. elegans development
Source: eLife. 2024 Jul 4;12:RP89903. doi: 10.7554/eLife.89903 (PMC11223767; doi:10.7554/eLife.89903)
Supplement: Figure 5—source data 2. [file elife-89903-fig5-data2.xlsx]

## Sheet: whole body
WT EL1	myrf-1(syb1313) EL1	WT LL1	myrf-1(syb1313) LL1	WT Mid-L2 21h	myrf-1(syb1313) Mid L2
311.41	885.565	724.277	4642.02	12554.1	10303.1
294.304	551.614	2014.29	5968.75	15919.9	14799.6
260.663	755.22	2909.49	2450.59	11742.1	7909.76
269.77	815.803	1443.83	2691.95	11936.4	9527.2
270.576	1098.54	1903.88	3553.83	11381.5	8711.37
291.494	988.591	1397.8	4954.72	10676.5	6269.22
298.118	598.859	3747.49	4466.82	16656.8	13758.3
315.993	662.39	5233.63	3307.08	12657.8	9217.73
268.911	628.73	1591.14	2587.87	13753	6636.95
272.159	870.499	1597.24	3655.46	15145.4	9577.28
295.278	702.406	4525.79	2284.04	10498.7	14331.9
312.533	604.194	2996.92	4654.73	11387.6	11848
293.546	639.954	2244.94	4235.81	14091.7	11264.4
295.693	738.121	3994.36	4923.82	15237.4	14731.9
289.292	970.757	1019.33	2652.68	13181.4	16300.8
	764.893		5084.6	12141.6	14216.3
	556.35			12346.9	12768.4
				11486.7	15002
				10701.2	12221.7

## Sheet: pharynx
WT EL1	myrf-1(syb1313) EL1	WT LL1	myrf-1(syb1313) LL1	WT Mid-L2	myrf-1(syb1313) Mid L2
245.288	551.625	14695	7577.49	45756.2	47037.3
249.734	743.762	13622	9178.16	54983.9	47699.9
254.453	714.856	4471.67	10179.2	59891	41919.1
245.943	756.119	969.736	36505.9	54789.4	49958.8
248.909	714.944	980.635	37066.6	52748.2	48400.1
249.09	440.668	2081.16	41422	51114.4	53945.7
247.371	461.745	327.748	31793.3	49759.2	40433
244.092	465.875	4981.35	30143.6	51263.3	34100.6
249.678	619.407	10096.9	40226.6	57937.8	24439.5
247.266	647.875	2578.96	12120.6	38764.4	37113.2
243.276	447.291	3461.81	16899.5	39973.8	39445.3
241.473	606.828	505.385	24271	44686.7	45075.1
244.477	653.056	551.212	24608.2	44263.6	51437.3
244.291	613.63	299.916	19702.4	63763.5	45383.7
247.333	464.835	9049.68	20874.1	52603.9	55789.4
248.816	409.015	330.073	43944.9	48851.6	51160.1
259.87	344.254	1998.68	44788.8	47873.4	47354.4
243.827	681.474	947.925	39363.8	35007	47432.4
245.9	421.309	889.473	30595.6	57693	56018.4
247.517	514.017	1077.13	22916.4	44023.2	48753.4
242.625	481.545	423.931	35359.4	35234.2	47188.1
243.73	449.627	262.892	18168.6	47553.2	41105.3
249.863	452.465	2720.45	16587.7	42361.9	53617.4
248.993	548.566	2952.36	29561.4	57155.5	51593
267.564	346.781	438.88	25915.3	45038.2	45158.8
254.566	343.688	1092.81	18561.7		43416.8
251.833	419.488	799.235	25967.4		35400.1
247.287	358.208	924.747	43026.9		35904.6
239.84	593.525	671.362	3933.94		47542.8
255.518	504.561	344.145	32529.8		47569.6
	365.123		21238.7		37099.5
	356.02		18857		40536.8
	353.317		31361.4		47155
	536.626		35902.4		39630
	426.098		11383		31752.4
	356.185				31003.3
	445.868				38882.8
	597.271				25130
	474.478				22927.5
	399.994				27466.7

## Sheet: head neurons
WT LL1	myrf-1(syb1313) EL1	WT LL1	myrf-1(syb1313) LL1	WT Mid-L2	myrf-1(syb1313) Mid L2
238.456	1877.44	4687.04	10289.4	30678.6	24036.6
246.069	1046.27	3613.27	9136.55	29773.2	16713.2
248.129	1704.3	685.107	8728.82	30707.9	16613.7
244.716	3276.97	776.138	8172.37	28373.6	21335.9
242.859	2563.24	757.173	12021	27335.5	27339
242.36	2068.22	691.6	8927.39	35243	25358
243.78	1460.7	2664.37	9145.73	23844.5	23578
248.809	2895.45	4380.36	10747.5	18127.6	12713.5
247.488	1447.47	2293.53	8553.23	25320.9	9540.6
243.332	2826.59	623.159	7067.11	23536.1	9737.97
236.111	2879.3	927.466	5685.73	27333.9	20422.7
239.477	4244.59	900.991	5653.78	24961.2	13837.4
234.428	5432.5	408.565	8852.06	22659.4	21616.7
240.744	2382.28	559.654	7203.7	26870	14462.6
242.601	2612.55	2754.46	11251.9	35406.2	22738
243.931	3167.21	788.475	12011.6	29305.8	17305.8
243.787	2563.73	1459.49	11069	26367	15345.7
242.648	4719.07	1411.36	13657.7	36705.1	19572.1
244.671	2292.57	1036.13	10966.3	20607.8	22150.3
239.287	4341.9	913.657	9557.88	20890.4	23065.9
242.77	2784.05	730.693	9171.92	27233.7	19382.6
237.672	1740.54	7090.84	9566.74	22476.3	16191.9
242.452	1772.33		8534.36		19236.2
247.269	1900.41		5744.47		21058.5
241.193	2854.64		12585.4		14458.9
245.56	2190.83		11032.3		24661.2
256.51	1695.39		9886.96		15503.5
239.226	3100.84		9472.82		17790.1
246.097	1808.72		9427.44		12137.1
	1242.61		11194.6		31101.9
	2732.86		8954.12		12661.5
	1784.51		6947.06		15244
	1460.35		8478.88		12512.1
	2287.09		6872.24		15392.3
	3072.96		9010.71		5672.16
	2162.61				8129.58
	2088.27				11759.6
	1540.65
