# Supplementary material for: Essential function of transmembrane transcription factor MYRF in promoting transcription of miRNA lin-4 during C. elegans development
Source: eLife. 2024 Jul 4;12:RP89903. doi: 10.7554/eLife.89903 (PMC11223767; doi:10.7554/eLife.89903)
Supplement: Figure 6—figure supplement 2—source data 1. [file elife-89903-fig6-figsupp2-data1.xlsx]

## Sheet: GFP-MYRF co-marker alone
0	10067.4	10199.4	10054.4	10154.9	10614.4	10097.6	10121.8	10139.2	10090.9	10052	10120.1	10105.2	10074.3	10097.4	10083.1	10138.4
0.04251	10090	10209.2	10075.9	10169.1	10642.8	10086.3	10127.6	10121.2	10086.7	10047.7	10154	10096.7	10082	10095.5	10083.1	10156.7
0.08503	10112.4	10218.3	10097.6	10172.1	10672	10076.2	10142.4	10101.1	10079.7	10049.7	10190.6	10098.3	10081	10101.9	10089.1	10189.8
0.12754	10123.8	10218.3	10105.8	10162.8	10694.8	10070.9	10152.1	10094.8	10077.2	10052	10195.3	10106	10073.7	10122.4	10091.5	10211.5
0.17006	10118.7	10198.2	10094.7	10154.3	10706	10068.7	10149.6	10106.6	10086.6	10050.9	10162.1	10114.3	10065	10153.2	10089.7	10195.7
0.21257	10105.6	10164.6	10075.9	10152.6	10703.1	10068.3	10143.3	10127.6	10107.2	10052	10125.5	10122.4	10067.4	10170.8	10093.7	10148.5
0.25509	10107	10139.8	10063.2	10155	10688.7	10064.1	10148.1	10147.7	10135.8	10061	10114.2	10131.6	10088.1	10164.3	10116.5	10101.7
0.2976	10131.3	10139.6	10059.4	10154.5	10671.3	10057.1	10167.8	10164.1	10165.1	10073.5	10120.8	10140.4	10117	10143.6	10153.6	10077.7
0.34012	10155.4	10159.6	10063.9	10150.7	10657.8	10048.3	10193.9	10182.9	10189.2	10085.5	10127.6	10146.2	10135.5	10126.3	10175.1	10072.2
0.38263	10156.1	10184.2	10081.9	10148.6	10641.9	10042.8	10215.8	10198.7	10203	10091.1	10126.7	10154.6	10135.1	10112.5	10159.9	10070.9
0.42515	10136	10194.8	10105.6	10160.9	10611.6	10047.3	10232.6	10207	10211.3	10088.6	10117.3	10171.7	10115	10104	10125.2	10076.7
0.46766	10115	10190.6	10112.5	10190.8	10561.8	10057.4	10255.2	10205.1	10218	10082.2	10104	10193.5	10090.3	10101.5	10101.2	10090.3
0.51018	10114.1	10178.6	10095.7	10229.3	10506.7	10068.9	10297.5	10198.4	10221	10072.7	10090.5	10223.8	10072.7	10103.5	10092.5	10102.2
0.55269	10139.8	10162.4	10075.6	10263.4	10478.1	10076	10358.7	10191	10229.4	10064.4	10079.2	10287	10066.6	10094.4	10087.4	10109.9
0.59521	10180.2	10143.5	10073	10271.9	10494.1	10078.5	10419.5	10184	10233.3	10056.6	10073.9	10390.4	10067.8	10075.5	10083.9	10121.6
0.63772	10222.9	10125.3	10082.8	10252.7	10535.8	10079.4	10462.1	10177.4	10210.2	10049.8	10078.7	10485	10070.2	10057	10082.9	10140.6
0.68024	10264.2	10115.5	10086.4	10213.5	10558.1	10076.1	10493.5	10177.5	10159.3	10045.9	10099.9	10520.2	10073.5	10051.6	10079.1	10156.5
0.72275	10333.5	10125.5	10077.5	10170.1	10542.2	10071.6	10530.6	10182.7	10110.9	10047.6	10138.5	10515.2	10075.7	10057.6	10076.7	10162.9
0.76527	10449.3	10150.1	10069	10137.5	10512.9	10067	10570.1	10188.5	10090.3	10050.7	10178.8	10522.4	10073.9	10071.7	10081.4	10163.8
0.80778	10618.7	10179.7	10074	10122	10500.5	10068.6	10589.5	10193.5	10099.6	10054.2	10204.1	10558.1	10067.7	10096.2	10094	10167.6
0.8503	10775.5	10200.7	10093.5	10122	10512	10076.6	10581.3	10198.2	10127.5	10061.7	10214.3	10619.1	10065.5	10125.1	10109.2	10179.7
0.89281	10817.9	10208.8	10124.4	10131.9	10534.3	10086.7	10561.3	10199.5	10156.1	10067.1	10218.6	10701.2	10069.9	10136.9	10130	10204.1
0.93533	10751.1	10215	10156.7	10148.6	10563.8	10096.9	10545.8	10202.6	10188.5	10066.6	10225.7	10759.7	10072.6	10132	10157.6	10232.6
0.97784	10652.1	10230.4	10178	10172	10609.3	10108.6	10539.2	10213.7	10238.1	10057.3	10237.2	10743.7	10070	10128.4	10195.8	10252.5
1.02036	10595.5	10239.6	10190	10197.5	10675.6	10123.7	10545.6	10221.6	10312.1	10045.3	10250.8	10685.6	10068.5	10132.8	10251	10259.6
1.06287	10570	10226.4	10198	10210.1	10746.7	10139.7	10571.4	10209	10391.3	10041.4	10262.6	10664.3	10071.4	10136.1	10323.8	10263.8
1.10539	10566.5	10196.2	10194.4	10204	10786.5	10148.2	10609.2	10179.4	10456.5	10045.7	10265.1	10693.9	10075.3	10138.2	10398.5	10280.3
1.1479	10583.2	10171.3	10174	10186.9	10776.8	10151.1	10640.8	10155.5	10499.6	10057.3	10248.1	10703.1	10075.8	10150	10458.6	10312.7
1.19042	10639.2	10162	10145.6	10166.6	10735.1	10154.8	10656.6	10153.2	10512.1	10070.7	10220.4	10653.4	10073.5	10171.4	10497.2	10345.4
1.23293	10712.9	10164.4	10119	10149.4	10703.9	10166.5	10661.4	10168.4	10522.5	10080.1	10210.6	10585.7	10074.7	10194	10532.4	10356.8
1.27545	10765.2	10174.2	10103.9	10140	10712.3	10201.6	10665.9	10181.4	10560.5	10080.4	10236.6	10540	10081.5	10205.9	10575.8	10348.5
1.31796	10783.1	10187.7	10114.6	10135.9	10753.2	10249.7	10685.2	10185	10656.5	10069.5	10291.7	10519.7	10094.9	10203	10625.5	10341.4
1.36048	10768.7	10200.5	10153.4	10133	10791.2	10319.1	10726.8	10188.4	10743	10057.1	10365.6	10517.8	10120	10181.9	10663	10349.8
1.40299	10727.4	10206.4	10208.3	10135.3	10788.9	10402.9	10777.6	10214	10744	10059.7	10447.9	10517.4	10161.5	10160.7	10667.5	10371.5
1.44551	10683.7	10204.8	10261.6	10144.1	10741.5	10483.5	10807.5	10266.7	10655.8	10075.2	10532.8	10501.5	10210.6	10158.6	10651.6	10391
1.48802	10665.7	10199.6	10296.2	10161.2	10682	10546.6	10798.7	10322.7	10544	10093.7	10622	10477.4	10256	10177.9	10655.4	10391.4
1.53054	10665.4	10203.1	10311.2	10184.1	10645.4	10578.7	10762.8	10354.1	10480	10103.3	10723.8	10471.4	10279.7	10198.2	10691.5	10365.4
1.57305	10675.7	10222.4	10333.7	10201.7	10635.5	10605.5	10720.3	10353.8	10484.4	10103	10825.2	10489.9	10292	10208.4	10726.8	10320.6
1.61557	10695.8	10259.2	10382.8	10211.7	10634.1	10643.7	10686.4	10335.5	10522.8	10100.9	10895.1	10521	10322.8	10200.6	10732.2	10285.2
1.65808	10713.2	10310.4	10438.9	10221.7	10635	10678	10678.6	10315.1	10530.8	10103.5	10919.1	10559.2	10363.8	10181.9	10718.3	10271.4
1.7006	10714.1	10371.4	10495.1	10254.5	10634.7	10657.6	10712.8	10321.3	10522.5	10123.9	10897	10592.2	10413.3	10167.5	10714.7	10280.1
1.74311	10722.2	10438.4	10564.2	10324	10620.2	10611.4	10778.9	10374	10510.6	10177.9	10837.6	10606.5	10464.7	10170.3	10728.9	10296.2
1.78563	10756.3	10505.2	10630.8	10430.4	10599.5	10595.9	10842.8	10475.5	10535.2	10259.9	10780.6	10617.3	10512.1	10198	10748.5	10312.2
1.82814	10802.7	10564.7	10674.6	10565.2	10613.1	10663.5	10882.6	10612.1	10611.8	10348.8	10797	10652.5	10586.9	10240.6	10771.2	10335.3
1.87066	10844.5	10608.8	10709.3	10693.4	10683.8	10784.8	10908.5	10748.7	10716.7	10434.1	10902.8	10724.5	10697.4	10280.3	10802.4	10378
1.91317	10878.1	10638.9	10744.4	10778.4	10773.8	10876.8	10936.5	10854.1	10801.5	10516.9	11033.8	10796	10805.1	10300.5	10836.7	10440.1
1.95569	10878.6	10640.6	10754.9	10794.7	10816	10899	10959	10897.4	10843	10557.7	11098.1	10805.7	10851.6	10303.7	10859.5	10496.3
1.9982	10839.3	10594.6	10721.5	10749.7	10786.5	10853.4	10955.9	10891.7	10834.1	10546.8	11073.3	10732.6	10838.2	10296.8	10842.7	10486.2
2.04072	10736.6	10501	10654.7	10693.6	10715.6	10793.2	10924.2	10852.3	10812.9	10501.7	11027.7	10623.5	10794.1	10271.5	10772	10409.4
2.08323	10606.6	10401.9	10577.8	10676.4	10655	10758.1	10878.8	10808.8	10765.7	10465.3	11030	10530.3	10728.7	10244.4	10680.4	10331.8
2.12575	10487.9	10348.6	10525.4	10698.8	10628.3	10756.7	10828.8	10794.2	10743.3	10441.9	11044	10482.2	10699.6	10228.9	10640.2	10292.1
2.16826	10424.2	10346.8	10523.1	10729	10616.5	10792.1	10774.3	10814.4	10730.9	10403.4	11011.7	10479.3	10721.2	10240	10687.2	10277.8
2.21078	10412.1	10380.9	10557.3	10736.4	10588.1	10838.8	10721.5	10857.9	10745.9	10357	10956.9	10482.4	10782	10260.2	10767.4	10260
2.25329	10413.5	10421.4	10598.8	10711.6	10536.4	10874	10681.2	10882.7	10774.6	10338.4	10931.6	10443.6	10845.2	10262.4	10808.4	10243.9
2.29581	10381.9	10447.7	10641.1	10661.2	10484.1	10881.1	10646.7	10855.5	10783.6	10373.9	10924.8	10357.7	10847.6	10245.4	10781.1	10239.2
2.33832	10317	10452.7	10686.5	10618.7	10442.4	10838.4	10597.8	10783.7	10729.6	10431.2	10877.9	10262.3	10787	10227.8	10697.1	10231.1
2.38084	10235.9	10435.8	10701.4	10617.8	10398.4	10787.3	10527.4	10719.5	10608.7	10469.1	10773.8	10191.9	10703	10228	10597.5	10207.2
2.42335	10177.5	10413.5	10649.1	10666	10334.6	10763.4	10455.1	10707	10469.8	10468.5	10679.4	10158.1	10628.2	10240	10531.6	10175.8
2.46587	10147.8	10406.1	10556.2	10736.8	10260.4	10771.8	10404.2	10741.6	10378.2	10452	10677.3	10145.9	10566.5	10253.1	10517.3	10149.2
2.50838	10141.9	10415	10501.8	10780.8	10199.2	10786.3	10377.9	10791.5	10340.4	10436.9	10759.3	10134.7	10520.1	10250.5	10541.9	10128.9
2.5509	10153.8	10427.2	10532	10777.5	10160.6	10769	10364.2	10833.8	10330.9	10402.9	10818.9	10115.6	10514.9	10237.8	10556.5	10110.1
2.59341	10180.3	10439.9	10610.2	10731.1	10140	10734	10358.6	10863.1	10320.2	10347.1	10791.5	10095.3	10537	10226	10558.7	10099.6
2.63593	10206.3	10455.1	10661.2	10660.6	10133.9	10695.4	10370.6	10873.9	10288.9	10310.3	10713.9	10083.2	10557.7	10224.3	10567.3	10106.8
2.67844	10220.4	10471.6	10657	10597.7	10139.5	10665.7	10402.8	10865.2	10247.5	10310.8	10665.7	10076.9	10548.2	10228.4	10579.6	10129.2
2.72096	10229.7	10475.8	10640.4	10564.6	10148.9	10654.8	10435.3	10839	10212.6	10319.4	10669.2	10067	10517.9	10221.2	10585.9	10145.6
2.76347	10245.1	10452.3	10651.2	10557.8	10154.5	10642.5	10447.8	10809.5	10194	10330.4	10680.7	10058.5	10494.6	10197.8	10577.9	10142.9
2.80599	10258.6	10405.3	10662	10561	10154.7	10634.6	10442	10794.7	10186.1	10365.7	10653.8	10064.4	10482.6	10174.6	10542.3	10127.5
2.8485	10256.8	10357.8	10608	10575.9	10150.9	10610.9	10431	10798.7	10181.6	10416.8	10577.9	10080.4	10472.5	10168.2	10493.1	10121
2.89102	10241.7	10328.3	10479.8	10599.5	10144.9	10572.3	10416.4	10806.1	10179	10454.2	10471.5	10088	10478.4	10182	10447.4	10126.9
2.93353	10227.8	10334.6	10338.6	10610.4	10136.6	10539.8	10389.7	10791.8	10167.2	10465.1	10363.6	10081.1	10490	10196.8	10400.6	10131.4
2.97605	10213.3	10382.4	10244.3	10588.9	10126.8	10528.9	10352.1	10739.4	10144	10473.9	10272.1	10068.7	10494.7	10204.2	10340.2	10126.7
3.01856	10190.4	10443.4	10209.9	10546	10114.2	10539.9	10319	10675.6	10117.8	10497.4	10201.6	10061.1	10491	10213.5	10277.9	10126.4
3.06107	10159.5	10483.5	10211.4	10510.7	10101.6	10558.2	10302.3	10631.5	10107.9	10501.1	10160.6	10061.4	10497.6	10220.9	10227	10139.8
3.10359	10138.8	10489.8	10205.7	10498.8	10092.3	10577.3	10296	10620	10123	10462.3	10145	10065.4	10534.9	10217.6	10186.1	10167.4
3.1461	10135.8	10484.5	10168.3	10497.1	10086.3	10600.8	10287.4	10643.4	10148.3	10392.1	10137.2	10066.4	10593.1	10198.8	10150.5	10205.3
3.18862	10142.2	10490.2	10130.7	10487.5	10083.4	10608.9	10276.5	10685.2	10157.3	10325.3	10125.7	10061.3	10631.7	10184.4	10127.5	10245.8
3.23113	10145.2	10522	10134.5	10466.6	10086.3	10580.2	10279.6	10697.2	10135.9	10284.9	10108.4	10054.7	10636.7	10180.3	10122.7	10272.9
3.27365	10147.5	10571.7	10165.8	10434.7	10096.6	10501.4	10305.6	10647.3	10106	10286.2	10093.6	10050	10615.3	10175.9	10132.5	10272.9
3.31616	10145.2	10609.9	10186.1	10402.7	10107.5	10402.4	10343	10535	10090.1	10315.9	10085.5	10048	10574.4	10161.4	10151.4	10256
3.35868	10145.9	10612.9	10178.8	10381.4	10114.5	10323.7	10370.2	10402.5	10094.8	10338.9	10082.3	10049	10509.4	10143.9	10169.8	10245.6
3.40119	10153.6	10571.1	10156.9	10365.6	10115.9	10275.5	10369.8	10307.7	10121	10326.7	10080.2	10051.8	10443.4	10126.1	10171.4	10251.9
3.44371	10168.9	10497	10142.5	10340	10113.8	10254	10337.4	10267.4	10152.9	10297.8	10073.7	10053.5	10411.2	10107.8	10146.3	10265.2
3.48622	10173	10425.2	10141.9	10304	10110.8	10239	10284.4	10253.6	10157.8	10291.4	10065	10059	10447.9	10090.6	10107.4	10267.7
3.52874	10163.7	10373	10147.1	10268.8	10106.8	10220.5	10237.4	10230.1	10136.5	10319.7	10059.9	10069.2	10536	10079.7	10079.4	10250.5
3.57125	10152.3	10345.2	10147.4	10242.1	10098.7	10207.4	10218.7	10185.6	10116.5	10348.2	10058.9	10085	10637.4	10075.1	10076.1	10223.7
3.61377	10143.4	10350.6	10139.2	10223.3	10090.8	10195.3	10224.2	10137.3	10111.9	10355.9	10059.1	10108.6	10708.4	10078.2	10085.3	10207.6
3.65628	10140.4	10386.3	10124.8	10215	10090.8	10183.9	10229.6	10101.3	10111.5	10346.1	10061.4	10129.4	10731.6	10085.4	10088.3	10216
3.6988	10143.6	10435.9	10115.4	10222.2	10101.4	10156.8	10217	10079.1	10101.3	10330.1	10067	10124.8	10718.7	10094.2	10083.7	10247.4
3.74131	10155.9	10478.9	10116.4	10245	10113	10117	10190.3	10065.7	10084.9	10311.2	10069.3	10092.6	10700.9	10096.1	10079.7	10285.3
3.78383	10168.3	10492.8	10121.1	10270	10114	10083	10163.6	10056.7	10077.1	10299.8	10062.7	10061.6	10683.5	10092.5	10080.4	10307.9
3.82634	10172.3	10474.4	10117.6	10285.5	10101.8	10068.1	10144.9	10049.9	10076.9	10321.3	10049.8	10051.2	10655.8	10086.7	10087.8	10310.5
3.86886	10172.3	10443.5	10103.7	10287.1	10085.2	10064.9	10131.9	10046	10072.8	10363.9	10041.9	10054.2	10621.3	10080.3	10095.2	10300.6
3.91137	10166	10405.5	10090.8	10268.1	10071.5	10067.5	10120.1	10046.6	10062	10394.2	10043	10054.5	10601.5	10072.8	10090.1	10291.9
3.95389	10156.8	10354.1	10087.7	10242.9	10066.5	10071.5	10109.4	10051.6	10055.2	10402	10048.5	10051.1	10608.4	10067.2	10073.6	10287.5
3.9964	10155.8	10286.9	10088.5	10230.9	10069	10070.7	10102	10060.4	10056.5	10389	10053.5	10053.3	10599.3	10064.3	10063.8	10284.2
4.03892	10164.2	10209.4	10082.7	10239.2	10072.7	10068.1	10101	10070.9	10058.7	10371.8	10057.4	10057.7	10556.7	10062	10064.3	10274.7
4.08143	10174.4	10145.2	10074.2	10256.5	10070.8	10060.6	10109.2	10078.8	10057.7	10357.9	10059.7	10052	10495.2	10060.7		10253.4

## Sheet: GFP-MYRF co-marker+Plin-4 DNA
0	10070.6	10104.1	10346.6	10158.3	10079.3	10288.7	10140.1	10143.3	10261.7	10414.6	10076.4
0.04251	10063.5	10108.8	10409.4	10153	10072.9	10335.2	10154.3	10164.9	10248.6	10467.2	10074.4
0.08503	10059.1	10136.2	10455.3	10151.7	10071.1	10348.4	10163	10191.9	10205	10511.8	10075.7
0.12754	10058.8	10191.6	10455.5	10158.5	10072.5	10321.2	10156.3	10208	10156.2	10562.1	10077.5
0.17006	10068.2	10256.9	10420.4	10163.6	10073.3	10286.4	10135.2	10205	10127.2	10603.8	10078.3
0.21257	10083	10305.5	10383.5	10159.8	10073	10273.6	10111.5	10192	10121.5	10604.4	10079.5
0.25509	10092.4	10326.6	10364.6	10150.4	10076.1	10271.5	10100.2	10187.6	10124.6	10579.5	10083.4
0.2976	10087.9	10323.5	10355	10149.5	10084.4	10268.1	10105.4	10201.5	10121.9	10580.2	10095.9
0.34012	10076.8	10319.7	10338.9	10158.1	10093.7	10255.9	10117.1	10234.4	10121.2	10622.9	10110.1
0.38263	10069.4	10315.2	10312.2	10162.1	10095	10262.6	10123.6	10288.6	10126.5	10672.1	10110.6
0.42515	10073	10304.8	10283.4	10151.2	10086.5	10299.8	10125.1	10365.8	10132.9	10693.5	10096.4
0.46766	10082.7	10297.5	10264.9	10131.7	10077.2	10341.8	10126.8	10457.2	10130.5	10695.2	10084.6
0.51018	10092.4	10291.8	10264.5	10119.3	10074.4	10365.3	10130.9	10543	10113.1	10683.3	10085.5
0.55269	10090.8	10276.7	10277.6	10120.4	10077.4	10348	10133.6	10607.4	10092	10651.2	10092.7
0.59521	10084.2	10258.4	10293.3	10133.3	10083.9	10307.6	10130.5	10646.3	10086.2	10594.3	10096.7
0.63772	10082.2	10247.6	10312.2	10154.9	10090.5	10269.1	10123	10663	10093.6	10508.8	10091.3
0.68024	10087.5	10255.7	10347.7	10179.5	10094.5	10255.1	10110.3	10658.8	10099.9	10426.5	10083.1
0.72275	10100.7	10275.2	10398.7	10194.6	10096.1	10267.4	10096.5	10632.5	10097	10382.3	10076.4
0.76527	10114.8	10297.8	10435.6	10189.3	10089.7	10297.8	10087.1	10585.3	10088	10384.5	10077.8
0.80778	10132.6	10325	10431	10173.2	10081.9	10329.5	10076.9	10525.8	10087.4	10409.3	10094.1
0.8503	10155.6	10358.7	10390.1	10166.8	10084.8	10348	10071.7	10471.2	10100.2	10422.2	10142.1
0.89281	10177.6	10398.6	10343.9	10177.3	10100.7	10346.6	10070.5	10437.3	10113.2	10400	10216.2
0.93533	10198.2	10444.4	10321.8	10191	10118.9	10336.4	10085.3	10426.6	10113.7	10358.4	10300.9
0.97784	10215.1	10492.8	10328.8	10196	10123.8	10317.9	10107.6	10423.4	10106.6	10320.8	10370.6
1.02036	10236.8	10522.3	10352.2	10196.5	10117.5	10317.8	10139.5	10409	10101.8	10307.4	10403.1
1.06287	10281.2	10530	10375.2	10201.6	10108.9	10336	10170.3	10382.4	10104.2	10318.8	10408.5
1.10539	10340.2	10517.4	10384.2	10209.5	10109.6	10366.7	10190.2	10356.3	10114.3	10357.6	10400.5
1.1479	10405.5	10504.9	10379.5	10225.8	10113.2	10399.9	10187.8	10337	10130.5	10425.3	10393.5
1.19042	10460.9	10496.8	10369.4	10244.6	10114.9	10416.6	10161	10319.6	10145	10504.1	10391.4
1.23293	10487.2	10500.1	10370.6	10257.6	10121.6	10419.8	10125.4	10305.9	10144.3	10576.2	10392.9
1.27545	10477.2	10519.9	10393.8	10257.4	10141.5	10420.9	10109.2	10312.2	10128.2	10616.4	10404.7
1.31796	10436.6	10571.4	10435.5	10248.3	10182	10440.7	10118.8	10348.9	10107	10623.9	10429.9
1.36048	10391.8	10669.9	10480.2	10240.2	10235	10486.8	10143.6	10398.9	10097.8	10611.3	10456.6
1.40299	10361.8	10795	10516.3	10231.9	10291.9	10564.7	10167.8	10433.6	10096.6	10587.9	10474.7
1.44551	10355.3	10912	10539.7	10220.4	10351.7	10666.5	10199.6	10435.2	10095.2	10568.6	10481.2
1.48802	10371.3	11005.2	10555.4	10219.1	10410.3	10795.7	10249	10408.5	10092.7	10555.4	10483.5
1.53054	10408.8	11068.3	10581.2	10250.2	10446.9	10935.2	10322.6	10375.7	10093.7	10557.3	10495.4
1.57305	10465.2	11103.3	10638.2	10333.1	10446.2	11078.3	10408.7	10361.2	10103.5	10578.5	10539.3
1.61557	10540.5	11135.6	10726	10470.1	10419.5	11231.5	10473.5	10376.3	10116.4	10615.6	10623.7
1.65808	10632.8	11188	10824.2	10648.7	10396.8	11390.8	10498.5	10413.1	10138.1	10677.6	10738.7
1.7006	10727.3	11254.3	10917.5	10849.2	10411.7	11502.6	10508.3	10459.1	10164.7	10790.6	10873.7
1.74311	10817.7	11309.7	11001.6	11083.3	10478.7	11535.9	10547.8	10519	10220.1	10945.4	11016.2
1.78563	10912.2	11337.9	11079.6	11366.5	10601.6	11492.7	10629.9	10613.2	10317.3	11107	11141
1.82814	11018.1	11379.9	11155.9	11695.6	10774.5	11460.6	10744.7	10746.8	10480.3	11229.6	11235.9
1.87066	11116.2	11461.6	11234.3	12018.7	10943.9	11500.6	10891.8	10891.9	10677.9	11319.1	11327
1.91317	11172.1	11530.5	11303.2	12270.7	11049.4	11586.9	11040.7	11006.4	10855.5	11379.8	11409.3
1.95569	11181	11553.4	11338.9	12409.1	11049.8	11634	11138.4	11062.9	10953.2	11390.9	11423.1
1.9982	11179.4	11510	11331	12400.7	10948.5	11602.5	11085.8	11051.6	10946	11346.9	11332.8
2.04072	11169.1	11401.7	11297.5	12251.5	10787.2	11528.5	10943.7	10974.2	10894.7	11274.3	11183.3
2.08323	11159.5	11284.7	11261.9	12021.5	10631.2	11477	10758.7	10848.1	10858	11195.9	11024.8
2.12575	11095.4	11187.8	11229.7	11816.8	10516.1	11475.5	10617.1	10711.9	10828.4	11103.8	10860.3
2.16826	10984.2	11127.3	11197.7	11705.4	10439	11472.9	10496.8	10600.4	10785.8	10982.6	10670.2
2.21078	10821.1	11084.6	11172.6	11684.9	10381.9	11401	10398.4	10520.2	10699.1	10856.2	10485.8
2.25329	10653.6	11012.8	11163.9	11704.1	10342.5	11232.3	10306.8	10453	10591.5	10740.6	10346
2.29581	10536.1	10917	11144.2	11722.9	10333.6	11000.1	10241	10379.2	10490.6	10637.4	10255.9
2.33832	10458.8	10835.4	11059.6	11735.8	10352.8	10772.8	10205.4	10294.4	10424.2	10531.8	10203.1
2.38084	10408.2	10776.4	10888	11738	10375.1	10589.6	10218.5	10208.5	10398.8	10425.7	10175.9
2.42335	10361.1	10738.3	10675	11703.4	10378.7	10463.1	10258.3	10137.8	10391	10338.6	10181.1
2.46587	10353	10695.3	10488.1	11616.3	10361.4	10375.5	10295.8	10098.2	10374.8	10279.4	10209.3
2.50838	10386.9	10627.4	10357.3	11490.5	10344.2	10319.6	10298.2	10092.2	10355.6	10250.4	10225.1
2.5509	10426.6	10545.4	10265.3	11342.4	10327.7	10289.6	10269.1	10108	10345.6	10238.5	10211.7
2.59341	10427.2	10456.1	10195.3	11183	10306.6	10270.7	10227.2	10126.1	10338.7	10235	10196.1
2.63593	10383.1	10371.2	10147.4	11033.9	10280.7	10262.4	10192.5	10132.9	10330.8	10238.3	10215.4
2.67844	10334.4	10288.4	10125.2	10926.1	10257.4	10261.4	10181.7	10128.6	10328.7	10250	10271.7
2.72096	10290.8	10214	10121.9	10844.5	10242	10266.6	10185.9	10120.8	10336.1	10271	10333.8
2.76347	10254.3	10169	10127.2	10760.6	10232.7	10269	10186.9	10119	10338.6	10298.7	10379.3
2.80599	10226.9	10148.9	10136.6	10669.5	10233.5	10258.4	10182.1	10132.9	10331.9	10323.2	10399.1
2.8485	10215	10141.6	10152.9	10596.7	10241.4	10236.2	10184.7	10161.4	10334.9	10347.5	10383.7
2.89102	10215.5	10138.7	10176.4	10573.6	10252.9	10208.8	10208.6	10186.3	10361.4	10381.1	10349.1
2.93353	10216.8	10136.2	10204.2	10616.5	10266.5	10185.8	10241.9	10186.9	10388.7	10417.3	10348.5
2.97605	10215.2	10136.5	10233	10713.4	10283.5	10179	10252.3	10166.1	10384.5	10436.6	10400.9
3.01856	10214	10142.1	10258.5	10824.4	10306.8	10187.5	10230.1	10147.7	10348	10404.4	10464.6
3.06107	10212.2	10155.5	10279.4	10882.5	10324.1	10210.5	10180.5	10146.1	10311.8	10346.9	10484
3.10359	10206.1	10172.1	10300.1	10843.3	10338.2	10224.6	10135	10151.4	10301.6	10288.4	10460.5
3.1461	10202	10177.5	10325.2	10719.8	10344.7	10232.7	10106.8	10146	10317.1	10245.2	10453
3.18862	10206.1	10174.5	10353.6	10568.7	10336.6	10243.8	10090.7	10127.1	10341.6	10213.9	10479.5
3.23113	10214.6	10169.6	10375.5	10455.5	10336.7	10263.4	10091.4	10106.2	10373.7	10188.4	10505.8
3.27365	10217.6	10170.6	10374.5	10418.7	10349.4	10277.1	10098.8	10090.5	10412.5	10170.6	10504.8
3.31616	10211.7	10183.7	10345.7	10432	10360.5	10272.3	10111.9	10080.9	10453.3	10153.2	10476.8
3.35868	10199.2	10204.9	10306.9	10457.1	10351.9	10250.4	10127.4	10076.7	10483.8	10136.3	10438.8
3.40119	10179.5	10221	10286.7	10466.8	10322.4	10232.5	10130.1	10075.7	10471	10126.7	10397.9
3.44371	10155.2	10223	10295.9	10454.5	10293	10227.6	10118.9	10077.9	10428.8	10127.4	10351.3
3.48622	10130	10213.4	10320.9	10427.5	10275.6	10224.4	10089.6	10080	10375.3	10131.1	10292.4
3.52874	10111.3	10204.5	10343.6	10394.6	10259.1	10219.4	10064.3	10080.8	10338.3	10137.3	10238.5
3.57125	10102.6	10206.1	10361.4	10368.5	10222.5	10206.1	10056.2	10077.3	10307.7	10137.7	10225.2
3.61377	10101	10216.6	10383.5	10354.8	10178	10197.2	10058.2	10070.3	10270.5	10128.8	10252.1
3.65628	10100.4	10231.4	10405.8	10349.2	10144.9	10195.1	10062.2	10063.1	10233.9	10112.5	10292.5
3.6988	10096.4	10244.8	10409.7	10336.9	10131.8	10198.9	10064.1	10060.9	10211.7	10091.6	10311.5
3.74131	10088.8	10249.4	10383.5	10306.2	10130.6	10202.5	10066.3	10063.9	10214.2	10079.3
3.78383	10075.9	10232.4	10331	10256.4	10126.9	10202.3	10069.4	10067.5	10245.2	10087.2
3.82634	10061.1	10197.9	10273.5	10201	10118	10193.4	10074.3	10068	10290.7	10109.1
3.86886	10050.2	10164.3	10231.6	10161	10110.4	10184.7	10082.3	10070.6	10325.7	10139.1
3.91137	10048.5	10150.9	10212	10142.2	10112.9	10183.8	10089.1	10083	10322.8	10163.7
3.95389	10056	10174.3	10209.5	10140.2	10128.2	10195.8	10088.7	10104.5	10290.4	10176.7
3.9964	10062.8	10220.1	10216.7	10144.4	10143.7	10223.7	10080.9	10124.1	10248.5	10171.1
4.03892	10065.6	10266.8	10232.2	10144.3	10147.6	10250.5	10070.8	10128.2	10211.6	10145.9
4.08143	10064.6	10303.3	10253	10140.6	10141.4	10259.7	10070.8	10116.7	10198.7	10115
