# Supplementary material for: Essential function of transmembrane transcription factor MYRF in promoting transcription of miRNA lin-4 during C. elegans development
Source: eLife. 2024 Jul 4;12:RP89903. doi: 10.7554/eLife.89903 (PMC11223767; doi:10.7554/eLife.89903)
Supplement: Figure 6—source data 1. [file elife-89903-fig6-data1.xlsx]

## Sheet: 微生信示例038
sample	dauer	non-dauer
N2	0	100
maIs134	11.97	88.03
ybqIs112	0	100
ybqIs112,maIs134	0	100
