# Supplementary material for: Essential function of transmembrane transcription factor MYRF in promoting transcription of miRNA lin-4 during C. elegans development
Source: eLife. 2024 Jul 4;12:RP89903. doi: 10.7554/eLife.89903 (PMC11223767; doi:10.7554/eLife.89903)
Supplement: Figure 6—source data 2. [file elife-89903-fig6-data2.xlsx]

## Sheet: Sheet1
	dauer	L4	young adult	adult
N2	0	0	3	97
maIs134	14	4	35	47
maIs134,ybqIs112	0	0	0	100
