# Supplementary material for: Essential function of transmembrane transcription factor MYRF in promoting transcription of miRNA lin-4 during C. elegans development
Source: eLife. 2024 Jul 4;12:RP89903. doi: 10.7554/eLife.89903 (PMC11223767; doi:10.7554/eLife.89903)
Supplement: Figure 6—source data 3. [file elife-89903-fig6-data3.xlsx]

## Sheet: Sheet1
	L3	L4-young adult	L2d-dauer
N2	2	98	0
maIs134	5	5	90
maIs134，ybqIs112	8	92	0
