# Supplementary material for: Essential function of transmembrane transcription factor MYRF in promoting transcription of miRNA lin-4 during C. elegans development
Source: eLife. 2024 Jul 4;12:RP89903. doi: 10.7554/eLife.89903 (PMC11223767; doi:10.7554/eLife.89903)
Supplement: Figure 6—source data 4. [file elife-89903-fig6-data4.xlsx]

## Sheet: Sheet1
hours	N2																									maIs134
14	305.562	291.938	292.118	253.916	313.94	284.586	268.541	272.805	273.361	285.366	285.397	284.5	288.496	332.134	286.564	271.024	270.423	289.942	309.78	263.507	268.091	305.763	289.073	273.169	281.674	283.166	281.689	314.605	292.965	269.997	289.432	284.435	279.349	266.318	295.974	297.045	281.518	306.413	285.893	305.089	290.987	311.995	260.283	273.2	283.826	310.31	265.14	276.645	265
19	307.793	393.749	331.157	342.849	321.311	406.38	348.761	322.777	433.776	320.388	418.707	327.415	344.396	417.451	327.473	339.115	378.399	395.21	327.397	314.09	430.009	358.316	382.39	337.046	356.421	296.808	351.837	319.277	333.923	326.178	319.493	306.548	335.748	362.926	299.161	338.036	317.546	331.43	299.398	301.538	306.948	296.494	322.611	303.685	282.716	313.477	317.294	320.076	311.368
22	465.007	455.757	502.598	437.258	465.111	451.012	393.411	350.54	418.439	441.925	450.203	443.461	458.484	467.696	486.153	455.315	421.392	375.128	436.683	453.952	461.594	477.152	397.036	443.526	394.485	391.323	371.111	397.121	370.344	335.325	349.44	411.185	353.829	368.631	396.287	368.74	371.935	421.452	355.501	344.149	303.303	388.848	454.295	366.805	329.54	373.529	437.856	404.154	410.488
26	546.84	540.727	578.8	483.324	383.087	560.64	525.556	457.729	445.42	533.035	424.727	475.199	475.643	478.197	457.231	548.383	412.907	462.346	512.407	475.816	435.014	464.261	530.813	444.924	499.947	421.278	436.707	407.926	326.004	390.065	385.798	405.023	411.829	378.255	404.888	435.244	397.137	382.563	396.55	413.868	411.158	454.927	350.11	434.774	458.092	410.558	430.519	422.53	428.45
30	530.354	572.82	612.809	541.999	537.942	513.846	518.271	560.903	602.796	559.603	566.678	602.71	546.194	528.435	561.527	555.626	511.05	565.429	549.486	486.147	498.411	446.274	517.306	529.227	436.816	442.11	448.916	446.187	442.264	500.453	446.789	423.159	412.294	426.699	420.072	466.157	444.591	451.251	436.834	459.553	436.407	448.939	447.054	485.873	436.234	406.046	440.43	447.853	446.599
36	763.473	622.229	729.984	719.911	700.298	683.736	700.882	681.259	628.574	647.778	690.474	670.55	710.365	740.537	792.018	714.035	701.145	729.182	785.122	598.092	758.854	608.397	747.375	663.391	603.64	562.389	556.988	498.972	577.524	472.789	542.759	554.703	455.231	440.289	560.846	601.401	500.115	483.74	450.772	497.72	540.331	515.919	841.697	675.16	486.405	481.945	553.671	559.47	525.719
42	757.322	816.92	799.094	820.293	806.927	809.622	869.814	779.881	763.835	809.024	849.263	818.689	594.82	762.978	792.752	773.911	827.074	922.49	801.642	824.016	774.949	852.803	780.064	835.899	813.799	584.765	649.837	581.483	628.009	581.246	602.1	602.054	612.25	595.046	616.473	608.111	589.562	626.909	621.62	589.79	577.354	564.866	584.112	596.262	640.4	607.974	601.26	610.453	613.694
48	877.243	789.942	938.411	879.711	898.523	823.989	902.211	924.596	779.383	772.907	920.02	1003.19	865.701	891.249	770.654	783.685	946.169	902.479	940.687	940.621	869.259	989.902	916.003	964.326	907.316	727.613	724.835	705.503	601.574	720.799	732.007	602.479	588.762	630.215	710.793	700.397	542.628	611.767	755.774	677.343	589.166	622.32	744.307	703.023	635.465	566.429	724.379	753.684	650.69
[truncated: 1 more columns]
