# Supplementary material for: Essential function of transmembrane transcription factor MYRF in promoting transcription of miRNA lin-4 during C. elegans development
Source: eLife. 2024 Jul 4;12:RP89903. doi: 10.7554/eLife.89903 (PMC11223767; doi:10.7554/eLife.89903)
Supplement: Figure 6—source data 5. [file elife-89903-fig6-data5.xlsx]

## Sheet: 7X tetO
location	GFP::MYRF-1 intensity	tetR-tagRFP intensity		location	GFP::MYRF-1 intensity	tetR-tagRFP intensity		location	GFP::MYRF-1 intensity	tetR-tagRFP intensity		location	GFP::MYRF-1 intensity	tetR-tagRFP intensity		location	GFP::MYRF-1 intensity	tetR-tagRFP intensity		location	GFP::MYRF-1 intensity	tetR-tagRFP intensity		location	GFP::MYRF-1 intensity	tetR-tagRFP intensity		location	GFP::MYRF-1 intensity	tetR-tagRFP intensity
1.0833	1897.13	2429.66		1.0833	2686.27	3640.09		1.0833	2404.35	2533.06		1.0833	1864.16	2133.23		1.0833	1973.52	2204.8		1.0833	2445.66	2344.32		1.0833	2558.55	2486.74		1.0833	1669.9	3063.01
1.1917	1879.68	2487.31		1.1917	2737.54	3533.52		1.1917	2315.57	2461.64		1.1917	1825.11	2182.19		1.1917	2136.71	2148.12		1.1917	2457.96	2395.13		1.1917	2600.45	2578.82		1.1917	1643.35	3092.06
1.3	1930.92	2489.5		1.3	2754.23	3425.75		1.3	2423.36	2413.47		1.3	1820.62	2126		1.3	2294.41	2183.6		1.3	2413.3	2397.47		1.3	2596.21	2489.85		1.3	1690.65	3088.66
1.4083	1807.38	2475.24		1.4083	2815.33	3550.82		1.4083	2423.44	2463.51		1.4083	1789.63	2210.95		1.4083	2502.07	2363.16		1.4083	2489.95	2407.09		1.4083	2646.19	2568.52		1.4083	1709.28	3125.1
1.5167	1837.22	2634.53		1.5167	2810.71	3521.93		1.5167	2529.2	2504.41		1.5167	1856.7	2169.92		1.5167	2871.02	2520.66		1.5167	2642.48	2409.65		1.5167	2587.74	2566.57		1.5167	1703.44	3224.42
1.625	1862.04	2571.09		1.625	2861.08	3409.69		1.625	2454.09	2580.2		1.625	1862.37	2163.76		1.625	3067.61	2593.62		1.625	2664.97	2407.43		1.625	2818.64	2639.06		1.625	1711.88	3112.31
1.7333	1895.35	2571.45		1.7333	2875.77	3431.4		1.7333	2631.36	2539.83		1.7333	1896.57	2189.67		1.7333	3191.42	2602.64		1.7333	2690.14	2492.9		1.7333	2809.58	2678.86		1.7333	1713.42	2988.1
1.8417	1897.19	2499.61		1.8417	2819.82	3422.9		1.8417	2728.62	2595.39		1.8417	1899.4	2230.04		1.8417	3447.27	2617.33		1.8417	2747.62	2521.05		1.8417	2868.77	2615.51		1.8417	1752.24	2994.59
1.95	1944.97	2536.73		1.95	2891.27	3492.98		1.95	2845.6	2764.41		1.95	1912.65	2263.83		1.95	3550.14	2801.03		1.95	2773.67	2500.52		1.95	2946.06	2572.87		1.95	1849.97	3003.29
2.0583	1988.52	2443.41		2.0583	2960.41	3600.44		2.0583	2989.92	2807.34		2.0583	1951.19	2260.25		2.0583	3852.75	2795.86		2.0583	2778.81	2587.34		2.0583	3023.14	2619.93		2.0583	1966.93	2974.6
2.1667	2005.96	2489.58		2.1667	2965.05	3556.31		2.1667	3103.71	2801.98		2.1667	2038.08	2324.32		2.1667	3988.62	2904.04		2.1667	2887.14	2533.78		2.1667	3170.57	2647.47		2.1667	2019.26	2899.54
2.275	2112.5	2493.61		2.275	3083.83	3767.93		2.275	3256.1	2823.84		2.275	2076.89	2351.77		2.275	4188.84	2943.26		2.275	2994.56	2600.32		2.275	3217.44	2700.34		2.275	2072.8	2840.51
2.3833	2201.49	2532.54		2.3833	3462.68	3855.53		2.3833	3655.19	3007.68		2.3833	2237.89	2302.93		2.3833	4417.8	2969.39		2.3833	3109.44	2609.25		2.3833	3353.63	2669.1		2.3833	2306.68	2803.38
2.4917	2610.17	2560.76		2.4917	4076.44	3841.36		2.4917	4287.12	3130.84		2.4917	2639.53	2438.79		2.4917	4537.74	2974.12		2.4917	3629.06	2669.38		2.4917	3559.11	2683.8		2.4917	2652.68	2784.82
2.6	3078.3	2574.17		2.6	4640.21	3677.69		2.6	4956.06	3272.5		2.6	3558.7	2625.3		2.6	4667.82	2832.29		2.6	4215.87	2719.28		2.6	4014.51	2732.57		2.6	3250.42	2767.67
2.7083	3750.54	2690.36		2.7083	5257.09	3422.18		2.7083	5755.25	3383.73		2.7083	4664.38	2668.36		2.7083	4954.04	2833.38		2.7083	5049.74	2769.85		2.7083	4861	2729.15		2.7083	4314.06	2786.41
2.8167	4320.87	2721.54		2.8167	5711.26	3540.16		2.8167	6384.15	3365.15		2.8167	5895.81	2776.39		2.8167	5125.59	2884.04		2.8167	5692.59	2900.03		2.8167	5923.21	2703.75		2.8167	5349.47	2707.65
2.925	4501.32	2750.3		2.925	5992.51	3507.81		2.925	6666.9	3482.14		2.925	6425.28	2956.38		2.925	5150.09	2821.55		2.925	5965.11	2884.85		2.925	6960.25	2881.35		2.925	6123.39	2687.88
3.0333	4347.23	2610.6		3.0333	5671.73	3414.14		3.0333	6667.74	3560.68		3.0333	6237.25	3067.93		3.0333	5011.29	2804.71		3.0333	5686.59	2869.91		3.0333	6891.57	2943.78		3.0333	6338.57	2710.83
3.1417	4068.17	2651.16		3.1417	5411.31	3443.85		3.1417	6202.46	3649.49		3.1417	5640.06	3104.34		3.1417	4986.07	2807.03		3.1417	5274.39	3080.38		3.1417	6398.18	3120.89		3.1417	6069.25	2734.38
3.25	3914.81	2810.46		3.25	5028.62	3306.3		3.25	5661.31	3803.54		3.25	5101.74	3339.42		3.25	5070.37	2731.83		3.25	4877.99	3244.16		3.25	5953.45	3157.67		3.25	5540.01	2777.33
3.3583	3684.82	2777.21		3.3583	4220.44	3060.63		3.3583	5150.88	3824.7		3.3583	4774.51	3282.14		3.3583	4942.21	2755.98		3.3583	4911.28	3201.41		3.3583	5623.94	3340.32		3.3583	5021.76	2790.09
3.4667	3448.43	2870.6		3.4667	3680.91	2966.44		3.4667	4941	3830.56		3.4667	4724.91	3232.02		3.4667	4879.48	2758.38		3.4667	4869.02	3226.8		3.4667	5521.35	3258.05		3.4667	4768.75	2747.3
3.575	3216.66	2743.35		3.575	2992.15	2958.95		3.575	4840.92	3774.02		3.575	4814.28	3202.3		3.575	4823.22	2750.79		3.575	5141.56	3414.44		3.575	5575.83	3214.8		3.575	4666.22	2716.86
3.6833	2846.65	2508.7		3.6833	2569.36	2901.12		3.6833	4879	3783.13		3.6833	4793.12	3227.65		3.6833	4841.05	2799.44		3.6833	5146.68	3337.97		3.6833	5593.04	3242.96		3.6833	4716.01	2719.49
3.7917	2720.18	2582.29		3.7917	2351.91	2782.66		3.7917	5061.32	3781.04		3.7917	4767.82	3300.98		3.7917	4593.93	2843.66		3.7917	5192.27	3437.02		3.7917	5656.93	3188.82		3.7917	4745.37	2657.76
3.9	2701.47	2706.81		3.9	2247.25	2729.13		3.9	5237.9	3713.37		3.9	4883.2	3248.64		3.9	4355.7	2842.64		3.9	5188.15	3344.76		3.9	5741.05	3243.79		3.9	4876.36	2621
4.0083	2706.85	2716.16		4.0083	2265.71	2776.4		4.0083	5154.55	3725.28		4.0083	4871.15	3262.17		4.0083	4290.23	2853.43		4.0083	5422.12	3395.34		4.0083	5748.04	3256.67		4.0083	5023.5	2568.6
4.1167	2664.56	2652.86		4.1167	2137.95	2716.95		4.1167	5328.94	3741.21		4.1167	4970.13	3292.71		4.1167	4138.12	2891.55		4.1167	5534.22	3289.36		4.1167	5760.54	3203.84		4.1167	5088.36	2561.17
4.225	2794.75	2689.96		4.225	2060.65	2677.79		4.225	5296.64	3650.05		4.225	4833.69	3384.45		4.225	4188.73	2863.89		4.225	5657.11	3365.44		4.225	5914.11	3234.54		4.225	5090.44	2603.31
4.3333	2821.04	2726.41		4.3333	2005.58	2736.29		4.3333	5189	3563.57		4.3333	4747.12	3468.77		4.3333	4351.18	2757.31		4.3333	5753.05	3234.18		4.3333	5826.01	3256.92		4.3333	5084	2605.75
4.4417	2771.97	2769.37		4.4417	2040.41	2695.07		4.4417	5244.43	3544.26		4.4417	4544.72	3585.15		4.4417	4760.24	2634.36		4.4417	5854.85	3284.54		4.4417	5756.94	3243.97		4.4417	5228.18	2544.46
4.55	2766.11	2721.3		4.55	2056.73	2636.2		4.55	5308	3474.7		4.55	4402.53	3721.34		4.55	4820.02	2669.09		4.55	5838.4	3235.51		4.55	5645.77	3349.16		4.55	5243.86	2567.8
4.6583	2615.02	2766.78		4.6583	2085.71	2642.44		4.6583	5238.34	3561.07		4.6583	4386	3645.17		4.6583	4586.31	2509.25		4.6583	5884.39	3124.54		4.6583	5669.7	3347.43		4.6583	5071.1	2578.15
4.7667	2524.17	2718.14		4.7667	2054.15	2612.61		4.7667	5173.03	3485.38		4.7667	4164.55	3614.8		4.7667	4150.67	2469.41		4.7667	5689.2	3161.83		4.7667	5493.34	3428.55		4.7667	4975.13	2478.62
4.875	2589.19	2662.88		4.875	2065.58	2595.6		4.875	5236.79	3464.36		4.875	4042.97	3768.56		4.875	3559.48	2416.33		4.875	5703.62	3216.71		4.875	5482.14	3466.53		4.875	4837.66	2501.35
4.9833	2407.44	2619.96		4.9833	2045.11	2637.05		4.9833	5007.69	3377.34		4.9833	3956.91	3621.41		4.9833	3019.89	2356.2		4.9833	5589.56	3152.38		4.9833	5313.02	3465.95		4.9833	4585.54	2540.14
5.0917	2477.83	2712.66		5.0917	2032.91	2648.45		5.0917	4924.62	3385.04		5.0917	3802.09	3580.89		5.0917	2668.93	2420.81		5.0917	5371.51	3209.2		5.0917	5261.47	3502.59		5.0917	4304.14	2582.84

## Sheet: 7X tetO+Plin-4 DNA
location	GFP::MYRF-1 intensity	tetR-tagRFP intensity		location	GFP::MYRF-1 intensity	tetR-tagRFP intensity		location	GFP::MYRF-1 intensity	tetR-tagRFP intensity		location	GFP::MYRF-1 intensity	tetR-tagRFP intensity		location	GFP::MYRF-1 intensity	tetR-tagRFP intensity		location	GFP::MYRF-1 intensity	tetR-tagRFP intensity		location	GFP::MYRF-1 intensity	tetR-tagRFP intensity		location	GFP::MYRF-1 intensity	tetR-tagRFP intensity
1.0833	2482.44	2607.75		1.0833	1377.29	2740.97		1.0833	3543.92	2268.18		1.0833	2034	1832.5		1.0833	3397.6	2212.87		1.0833	1236.75	1549.49		1.0833	2580.97	2579.8		1.0833	2148.26	1848.63
1.1917	2611.97	2476.32		1.1917	1561	2918.38		1.1917	3871.12	2322.18		1.1917	2042.26	1857.24		1.1917	3243.2	2213.6		1.1917	1266.46	1546.13		1.1917	2551.83	2747.01		1.1917	2103.11	1943.73
1.3	2638.61	2482.88		1.3	1437.49	2840.35		1.3	3970.88	2406.71		1.3	2009.48	1856.58		1.3	3207.57	2252.17		1.3	1272.79	1515.57		1.3	2601.62	2829.62		1.3	2007.45	1938.7
1.4083	2634.71	2416.33		1.4083	1467.17	2839.76		1.4083	4021.88	2387.06		1.4083	2049.09	1966.8		1.4083	3329.17	2205.34		1.4083	1315.81	1532.63		1.4083	2538.76	2611.3		1.4083	1987.89	1954.45
1.5167	2811.82	2468.39		1.5167	1492.44	2781.95		1.5167	4078.96	2328.6		1.5167	2096.73	1894.08		1.5167	3331.57	2237.24		1.5167	1388.54	1645.13		1.5167	2538.79	2703.44		1.5167	2005.26	1871.48
1.625	2738.17	2318.93		1.625	1588.58	2891.95		1.625	4145.23	2302.97		1.625	2026.8	1844.99		1.625	3463.78	2256.4		1.625	1400.86	1556.51		1.625	2567.14	2742.92		1.625	1975.12	1873.56
1.7333	2756.26	2348.59		1.7333	1625.55	2743.78		1.7333	4079.1	2359.04		1.7333	2068.81	1902.12		1.7333	3404.8	2232.4		1.7333	1450.4	1531.78		1.7333	2660.09	2866.06		1.7333	1990.53	1976.52
1.8417	2857.65	2398.34		1.8417	1667.04	2752.69		1.8417	4020	2417		1.8417	2153.73	1850.81		1.8417	3476.53	2128.83		1.8417	1632.27	1588.64		1.8417	2749.2	2922.75		1.8417	2031.38	2050.48
1.95	2787.45	2360.46		1.95	1700.75	2712		1.95	4000.77	2514.21		1.95	2041	1860		1.95	3463.53	2238.82		1.95	1800.74	1591.39		1.95	2753.4	2924.78		1.95	1982.95	2063.01
2.0583	2700.4	2250.34		2.0583	1718.3	2692.98		2.0583	4009.44	2454.68		2.0583	2089.87	1912.28		2.0583	3510.11	2228.64		2.0583	1981.58	1643.94		2.0583	2886.09	3033.86		2.0583	1999.22	2131.39
2.1667	2675.06	2348.96		2.1667	1734.06	2588.06		2.1667	4047.76	2645.02		2.1667	2095.21	1877.17		2.1667	3500.43	2308.74		2.1667	2199.4	1813.86		2.1667	3078.25	2990.25		2.1667	2122.2	2186.76
2.275	2635.91	2343.58		2.275	1803.18	2679.34		2.275	4193.94	2909.88		2.275	2085.29	1869.75		2.275	3729.6	2434		2.275	2534.56	1957.71		2.275	3188.41	3020.7		2.275	2162.76	2177.85
2.3833	2701.24	2517.59		2.3833	1879.58	2763.84		2.3833	4322.26	3329.15		2.3833	2137.31	1988.69		2.3833	4091.28	2679.94		2.3833	2967.62	2104.21		2.3833	3495.38	3226.45		2.3833	2232.07	2474.78
2.4917	3032.56	2865.2		2.4917	2062.18	2973.26		2.4917	4582.82	4237.88		2.4917	2243.12	2035.21		2.4917	4656.62	3169.99		2.4917	3537.95	2372.09		2.4917	3955.36	3635.77		2.4917	2540.16	2476.76
2.6	3415.27	3190.55		2.6	2680.24	3333.7		2.6	5319.38	4971.67		2.6	2497.47	2141.79		2.6	5303.88	3880.96		2.6	3950.5	2608.66		2.6	4565.81	4057.72		2.6	3147.7	2776.87
2.7083	3747.93	3546.48		2.7083	3672.5	3963.25		2.7083	5826.23	5111		2.7083	2976.36	2705.16		2.7083	5807.21	4671.95		2.7083	4395.9	3418.1		2.7083	5212.42	4708.54		2.7083	3732.62	3130.41
2.8167	4105.23	3883.77		2.8167	4638.37	4488.3		2.8167	6286.35	5175.08		2.8167	3695.67	3162		2.8167	6196	5267		2.8167	4616.03	3924.95		2.8167	5644.27	5314.69		2.8167	4124.82	3256.09
2.925	4330.74	4094.51		2.925	5193.99	4641.56		2.925	6402.06	5736.18		2.925	4377.85	3247.11		2.925	6313.14	5653.14		2.925	4732.87	4023.43		2.925	6154.09	5748.6		2.925	4301.04	3265.74
3.0333	4289.56	4343.89		3.0333	5255.9	4566.51		3.0333	6321.94	5708.45		3.0333	4614.06	2857.97		3.0333	6379.78	5707.33		3.0333	4817.5	3987.5		3.0333	6229.75	6208.5		3.0333	4229.5	3173.02
3.1417	4237.32	4393.11		3.1417	5061.76	4256.73		3.1417	6242.12	5313.12		3.1417	3956.96	2286.95		3.1417	6249.3	5217.32		3.1417	4516.04	3641.32		3.1417	5973.3	6150.56		3.1417	3921.22	2913.72
3.25	3668.9	3610.69		3.25	4530.21	3867.52		3.25	5952.15	4858.69		3.25	2921.88	2060.62		3.25	5764.46	4943.77		3.25	4248.29	3154.98		3.25	5450.65	5749.74		3.25	3684.06	2862.87
3.3583	2878.92	2911.96		3.3583	3832.42	3540.72		3.3583	5599.38	4081.41		3.3583	2148.86	1944.49		3.3583	5350	4823		3.3583	3987.66	2963.04		3.3583	5094.59	4914.84		3.3583	3076.11	2594.41
3.4667	2290.14	2356.39		3.4667	3183.5	3140		3.4667	4828.6	3418.62		3.4667	1872.81	1830.83		3.4667	4713.2	4177.48		3.4667	3565.28	2447.53		3.4667	4820.09	4017.94		3.4667	2669.84	2538.95
3.575	1838.63	2086.39		3.575	2719.89	2980.3		3.575	4234.82	2841.82		3.575	1676.03	1776.07		3.575	4323.35	3320.95		3.575	3467.72	2381.59		3.575	4501.33	3577.19		3.575	2298.39	2448.54
3.6833	1524.83	1990		3.6833	2625.36	2911.68		3.6833	3751.88	2472.88		3.6833	1549.5	1665.5		3.6833	4189.05	2881.62		3.6833	3248.78	2371.22		3.6833	4310.42	3355.26		3.6833	1990.35	2366.16
3.7917	1253.46	1829.2		3.7917	2657.93	2840.06		3.7917	3521.94	2351.5		3.7917	1476.36	1587.69		3.7917	4062.2	2721.9		3.7917	3154.76	2171.57		3.7917	4274.33	3171.66		3.7917	1819.41	2217.38
3.9	1181.22	1745.61		3.9	2736.41	2908.67		3.9	3476.62	2294.83		3.9	1484.76	1628.44		3.9	4014.8	2514.6		3.9	3224.2	2196		3.9	3870	2793		3.9	1632.34	2162.82
4.0083	1130.62	1624.82		4.0083	2696.16	2924.32		4.0083	3356.88	2327.53		4.0083	1499.2	1560.58		4.0083	3987.26	2481.89		4.0083	3275.33	2204.25		4.0083	4018.45	2908.02		4.0083	1498.11	2128.41
4.1167	1058.12	1770.87		4.1167	2598.33	2920.06		4.1167	3337.31	2176.82		4.1167	1539.5	1643.81		4.1167	3981.5	2476.91		4.1167	3297.63	2225.78		4.1167	3858.31	2955.37		4.1167	1415.91	1991.59
4.225	1008.26	1730.04		4.225	2587.38	2939.12		4.225	3248.18	2168.74		4.225	1479.32	1658.69		4.225	3952.25	2381.12		4.225	3423.61	2192.91		4.225	3613.79	2912.75		4.225	1362.48	1966.91
4.3333	933.918	1716.63		4.3333	2581.3	2965.68		4.3333	3376.47	2209.15		4.3333	1538.36	1626.84		4.3333	3832.34	2214.6		4.3333	3473.07	2185.65		4.3333	3510.34	2855.69		4.3333	1382.43	1984.68
4.4417	926.789	1812.73		4.4417	2487.15	2879.26		4.4417	3168.65	2192.35		4.4417	1433.86	1655.81		4.4417	3982.4	2275.4		4.4417	3329.69	2232.43		4.4417	3386.69	2823.31		4.4417	1363.88	1878.84
4.55	965.753	1788.35		4.55	2433.2	2785.28		4.55	3244.06	2182.15		4.55	1458.17	1602.67		4.55	4091.91	2492.16		4.55	3402.94	2240.2		4.55	3235.32	2815.58		4.55	1321.28	1890.52
4.6583	966.483	1819.8		4.6583	2364.91	2773.55		4.6583	3164.06	2227.74		4.6583	1657.63	1510.61		4.6583	3959.1	2360.99		4.6583	3341.7	2304.99		4.6583	3016	2693.97		4.6583	1271.98	1962.47
4.7667	952.216	1828.27		4.7667	2325.65	2670.1		4.7667	3168.91	2219.77		4.7667	1603.99	1553.36		4.7667	3706.3	2269.77		4.7667	3145.21	2339.83		4.7667	2752.75	2594.38		4.7667	1276.82	1899.39
4.875	952.396	1739.54		4.875	2148.6	2690.02		4.875	3270.88	2275.29		4.875	1638.71	1630.75		4.875	3463.06	2278.86		4.875	3042.37	2250.82		4.875	2658.58	2428.06		4.875	1286.65	1850.72
4.9833	991.522	1692.97		4.9833	1932.5	2745		4.9833	3416.15	2279.95		4.9833	1590.75	1624.38		4.9833	3286.8	2233.4		4.9833	2853.76	2236.3		4.9833	2542.15	2337.68		4.9833	1249.58	1815.84
5.0917	981.417	1714.94		5.0917	1825	2621.79		5.0917	3466.15	2106.29		5.0917	1557.16	1572.96		5.0917	3193.2	2193.36		5.0917	2598.75	2158.38		5.0917	2333.9	2340.26		5.0917	1253.44	1816.34
