# Supplementary material for: Essential function of transmembrane transcription factor MYRF in promoting transcription of miRNA lin-4 during C. elegans development
Source: eLife. 2024 Jul 4;12:RP89903. doi: 10.7554/eLife.89903 (PMC11223767; doi:10.7554/eLife.89903)
Supplement: Figure 7—source data 1. [file elife-89903-fig7-data1.xlsx]

## Sheet: deferentially expressed
		group	myrf-1(ju1121)	myrf-1(ju1121)	myrf-1(ju1121)	wt	wt	wt		average
		sample	ju1121_1	ju1121_2	ju1121_3	wt_1	wt_2	wt_3		TPM ju1121	TPM wt
		miR-241-5p	21.6011	5.10266	10.6276	188.041	162.516	112.526		12.4438	154.361
		miR-71-5p	87485.6	121747	125147	30817.8	30782.4	42878.3		111460	34826.2
		lin-4-5p	384.943	87.4741	173.47	2642.77	2351.82	1384.11		215.296	2126.23
		miR-70-3p	10382.9	20963.2	11034.6	51616.1	79663.1	47174.8		14126.9	59484.7
		miR-48-3p	2.2155	0	0.685653	12.6871	13.2447	10.2495		0.967051	12.0604
		let-7-5p	139.576	61.9608	50.3955	26.5069	18.9721	10.2495		83.9776	18.5762
		miR-241-3p	2.2155	0.728951	1.71413	12.0074	23.9836	8.2868		1.55286	14.7593
		miR-82-5p	1.10775	5.83161	4.11392	13.3668	30.069	15.9194		3.68443	19.785
		miR-48-5p	657.449	134.856	157.7	2066.18	2804.65	1151.65		316.669	2007.49
		miR-84-3p	7.20037	8.01846	7.88501	20.1634	41.1659	26.605		7.70128	29.3114
		miR-230-3p	488.518	1346.37	1037.74	362.262	531.935	407.144		957.542	433.78
		miR-57-5p	37526.7	83691.6	51445.6	22639.9	36145.1	22960.6		57554.6	27248.5
		miR-70-5p	2.2155	0	0.342826	7.70287	5.36946	9.59525		0.852775	7.55586
		miR-73-3p	6504.15	12045.2	11922.8	5771.26	5946.14	3315.38		10157.4	5010.93
		miR-77-5p	55.3875	26.9712	14.7415	148.167	308.923	56.263		32.3667	171.118
		miR-246-3p	70.3421	30.6159	18.1698	14.9526	16.4663	10.0314		39.7093	13.8168
		miR-43-3p	26.0321	24.7843	28.1118	40.7799	98.7981	98.7874		26.3094	79.4551
		miR-42-5p	12.7391	64.1477	78.1644	15.8589	22.1938	17.0098		51.6837	18.3541
		miR-86-3p	784.287	621.066	694.909	1146.6	1951.98	2206.91		700.087	1768.49

## Sheet: all microRNA
Symbol	wt_01.tpm	wt_02.tpm	wt_03.tpm	case_01.tpm	case_02.tpm	case_03.tpm
cel-let-7-3p	1.13278	0	0.654221	0.553875	0	0
cel-let-7-5p	26.5069	18.9721	10.2495	139.576	61.9608	50.3955
cel-lin-4-3p	0	0	1.52652	0	0	0
cel-lin-4-5p	2642.77	2351.82	1384.11	384.943	87.4741	173.47
cel-lsy-6-3p	50.5218	34.0066	39.0352	30.4631	18.9527	39.0822
cel-lsy-6-5p	0	0.357964	0.218074	0	0	0
cel-miR-1018	38.5144	52.6207	64.986	69.7882	45.195	34.6255
cel-miR-1019-5p	0.226555	0.357964	0	0	0	0
cel-miR-1020-3p	17.6713	23.6256	23.77	10.5236	5.83161	6.85653
cel-miR-1020-5p	0	0	0.218074	0	0	0
cel-miR-1022-3p	0.679665	0	0.436148	0	1.4579	0.685653
cel-miR-1022-5p	760.772	645.767	800.113	534.489	785.809	582.805
cel-miR-124-3p	22.2024	27.2053	28.5677	29.3554	5.10266	14.7415
cel-miR-124-5p	2.94522	2.50575	1.52652	4.98487	1.4579	5.82805
cel-miR-1-3p	119453	184521	286474	154899	59061.8	66547.8
cel-miR-1-5p	235.617	283.507	223.308	186.656	146.519	214.952
cel-miR-1817	0	0.715928	0.436148	0	0.728951	0.685653
cel-miR-1819-3p	3.17177	3.9376	7.19643	4.98487	2.9158	5.48522
cel-miR-1820-3p	2.26555	3.22168	1.09037	2.76937	0.728951	3.08544
cel-miR-1820-5p	893.08	1837.79	557.615	474.671	4584.37	1917.43
cel-miR-1821-3p	313.779	332.907	319.696	336.756	388.531	373.681
cel-miR-1821-5p	0.45311	0.357964	0.218074	0	4.37371	0.685653
cel-miR-1822-3p	49.8421	28.6371	26.8231	18.8317	39.3634	28.4546
cel-miR-1822-5p	0.90622	3.9376	1.96266	2.76937	1.4579	3.77109
cel-miR-1823-3p	1.35933	0.357964	1.96266	0	0	2.39978
cel-miR-1824-3p	0	0	0.218074	0	0	0
cel-miR-1824-5p	3.17177	5.0115	3.70725	2.2155	1.4579	1.37131
cel-miR-1828	0	0	0.654221	0	0	0
cel-miR-1829a-3p	15.6323	16.1084	6.54221	4.98487	16.7659	15.0844
cel-miR-1829a-5p	68.4196	79.826	58.2257	36.5557	110.072	52.1096
cel-miR-1829b-3p	10.6481	10.7389	3.92533	0.553875	5.10266	10.6276
cel-miR-1829b-5p	4.5311	9.30706	6.32414	1.10775	2.18685	2.05696
cel-miR-1829c-5p	25.8273	30.7849	14.1748	11.0775	27.7001	23.3122
cel-miR-1830-3p	27.4132	27.5632	22.8977	14.9546	61.9608	18.5126
cel-miR-1830-5p	0.679665	0.357964	0.436148	2.76937	0.728951	1.02848
cel-miR-1832a-3p	0.45311	1.43186	2.83496	1.66162	3.64476	1.71413
cel-miR-1832a-5p	2.26555	1.07389	1.30844	0.553875	2.9158	3.08544
cel-miR-1832b-3p	0	0	0.218074	0	0	0
cel-miR-1832b-5p	0	0.357964	0	0	0	0.342826
cel-miR-2207-5p	0.45311	0.357964	0.436148	1.66162	0	0.342826
cel-miR-2208a-5p	0.679665	2.14778	1.52652	0	0	2.74261
cel-miR-2208b-3p	0.45311	0	0.218074	0	0	0.342826
cel-miR-2208b-5p	2.039	2.14778	2.18074	0	2.9158	4.45674
cel-miR-2209a-3p	6.34354	1.43186	2.39881	2.76937	2.18685	1.71413
cel-miR-2209c-3p	0	0	0	0.553875	0	0
cel-miR-2210-3p	7.47632	6.80132	2.39881	7.75425	6.56056	15.4272
cel-miR-2211-3p	0.226555	1.07389	0	0	0.728951	0.685653
cel-miR-2212-5p	11.3278	11.8128	11.3398	4.98487	11.6632	9.94197
cel-miR-2213-3p	0.226555	0.357964	0	0	0	0
cel-miR-2213-5p	1.35933	0.715928	0.654221	0	0	0.342826
cel-miR-2215-3p	0	0	0.218074	0	0	0
cel-miR-2216-3p	0.226555	0	0	0	0	0.342826
cel-miR-2216-5p	0.90622	0.715928	0.872295	0	0	0
cel-miR-2217a-3p	1.58589	2.50575	0.436148	1.10775	1.4579	0.342826
cel-miR-2217b-3p	0.226555	0	0.218074	1.66162	0	0
cel-miR-2218b-3p	0	0	0.218074	1.10775	0.728951	0
cel-miR-2219-3p	0.679665	0.715928	0.436148	0	0	0
cel-miR-2219-5p	0	0.357964	0	0	0	0
cel-miR-2220-3p	9.74187	11.0969	15.2652	11.6314	2.18685	5.82805
cel-miR-2220-5p	0	0	0.218074	0	0	0
cel-miR-2221	0	0	0	0	0	0.342826
cel-miR-228-3p	243.773	293.888	234.647	200.503	251.488	451.845
cel-miR-228-5p	66088.8	34051	35132.1	61792.5	74922.3	79059.2
cel-miR-229-3p	641.831	440.654	327.111	275.83	457.781	791.929
cel-miR-229-5p	785.92	1057.78	697.618	722.253	2285.99	1498.84
cel-miR-230-3p	362.262	531.935	407.144	488.518	1346.37	1037.74
cel-miR-230-5p	41.9127	81.2578	68.6932	38.2174	153.08	63.7657
cel-miR-231-3p	128.004	104.525	108.819	112.437	86.7452	153.929
cel-miR-231-5p	58.9043	142.47	196.484	52.0642	57.5871	34.2826
cel-miR-232-3p	105.801	118.128	93.7717	78.0964	45.195	82.2783
cel-miR-232-5p	3.17177	2.14778	2.83496	0.553875	5.10266	3.42826
cel-miR-233-3p	464.211	416.312	497.208	698.436	255.862	360.311
cel-miR-233-5p	4.5311	4.29557	5.45184	4.98487	5.10266	5.1424
cel-miR-234-3p	1107.63	1086.42	1247.16	705.083	793.099	705.88
cel-miR-234-5p	0.679665	0.357964	0	0	0	0
cel-miR-235-3p	2123.05	1930.5	652.477	1570.79	1238.49	1465.58
cel-miR-235-5p	38.7409	15.7504	7.19643	3.87712	4.37371	6.5137
cel-miR-236-3p	1053.48	1800.2	1236.48	289.677	737.699	889.292
cel-miR-236-5p	13.3668	11.4548	12.4302	2.76937	13.8501	10.2848
cel-miR-237-3p	8.38254	7.51724	15.7013	6.6465	0.728951	6.17088
cel-miR-237-5p	358.637	282.434	293.745	272.506	349.168	317.114
cel-miR-238-3p	8920.61	9921.69	6190.46	7975.24	12882.8	9642.68
cel-miR-238-5p	14.7261	18.9721	5.0157	5.53875	11.6632	22.6265
cel-miR-239a-3p	36.4754	72.3087	36.4183	81.4196	64.8767	50.7383
cel-miR-239a-5p	10.195	36.8703	33.1472	4.98487	23.3264	11.6561
cel-miR-239b-3p	0	0	0	0.553875	0	0
cel-miR-239b-5p	0	2.14778	1.09037	0	0	0
cel-miR-2-3p	1181.71	1015.54	947.749	989.22	572.956	907.462
cel-miR-240-3p	3.39833	1.78982	3.48918	6.09262	3.64476	3.08544
cel-miR-240-5p	0.90622	1.07389	1.30844	2.76937	0	1.71413
cel-miR-241-3p	12.0074	23.9836	8.2868	2.2155	0.728951	1.71413
cel-miR-241-5p	188.041	162.516	112.526	21.6011	5.10266	10.6276
cel-miR-242	455.602	387.675	290.474	615.909	178.593	659.598
cel-miR-243-3p	240.375	198.312	267.14	322.355	350.626	299.973
cel-miR-243-5p	3.62488	3.22168	3.70725	1.66162	2.9158	2.74261
cel-miR-244-3p	2.26555	1.78982	2.39881	1.10775	0	0.685653
cel-miR-244-5p	2506.83	2740.21	2128.4	1532.57	2015.55	1414.16
cel-miR-245-3p	1320.14	785.015	943.605	1831.11	1073.02	1780.64
cel-miR-245-5p	0.679665	0	0.436148	0.553875	0.728951	0.342826
cel-miR-246-3p	14.9526	16.4663	10.0314	70.3421	30.6159	18.1698
cel-miR-246-5p	0	0	0.218074	0	0	0
cel-miR-247-3p	35.7957	78.7521	30.0942	34.3402	43.0081	21.9409
cel-miR-248	1159.96	1121.5	904.57	483.533	1379.9	1022.99
cel-miR-249-3p	86.7706	123.856	181.001	183.333	193.901	134.731
cel-miR-249-5p	0.45311	0	0.218074	0	0.728951	0
cel-miR-250-3p	556.419	474.66	346.955	501.257	163.285	431.276
cel-miR-250-5p	28.3194	49.0411	23.77	16.6162	47.3818	64.1085
cel-miR-251	86.9972	102.736	84.8307	110.775	91.8478	82.2783
cel-miR-252-3p	0.226555	0.715928	0.218074	0	0	1.37131
cel-miR-252-5p	467.157	337.918	234.865	216.565	317.823	422.362
cel-miR-253-3p	120.301	73.0247	115.143	2182.27	154.538	249.92
cel-miR-253-5p	0.679665	1.07389	1.96266	9.41587	0	0.342826
cel-miR-254-3p	1.81244	10.381	20.4989	11.6314	18.2238	4.79957
cel-miR-254-5p	0.45311	0.715928	1.09037	0	1.4579	0.342826
cel-miR-255-3p	12.234	29.353	21.1532	6.09262	27.7001	16.1128
cel-miR-255-5p	2.039	7.87521	14.6109	9.41587	6.56056	12.6846
cel-miR-259-3p	15.1792	15.0345	5.45184	2.76937	20.4106	13.3702
cel-miR-259-5p	121.66	131.015	93.7717	58.1569	104.24	97.3627
cel-miR-2-5p	66.1541	118.128	98.7874	45.4177	45.195	47.9957
cel-miR-266	0	0	0	0	0	0.342826
cel-miR-2953-3p	25.6007	28.9951	42.0882	10.5236	16.7659	12.3418
cel-miR-2953-5p	0.226555	0	0	0.553875	0	0.342826
cel-miR-34-3p	28.5459	22.5517	25.2966	37.6635	8.01846	19.5411
cel-miR-34-5p	178.979	208.335	196.048	265.86	167.659	301.687
cel-miR-35-3p	2840.09	1586.5	1635.77	1353.12	1352.93	1591.4
cel-miR-354-3p	0	0	0.218074	1.10775	0	0.342826
cel-miR-354-5p	0	1.43186	0.218074	1.66162	0.728951	2.74261
cel-miR-355-5p	338.926	370.135	410.851	404.883	301.786	247.864
cel-miR-35-5p	0.90622	0.357964	1.30844	1.10775	0	0.685653
cel-miR-356a	1.35933	1.07389	0.436148	1.10775	2.18685	1.37131
cel-miR-356b-3p	101.723	93.4286	66.9487	74.7731	59.045	104.562
cel-miR-356b-5p	0	0	0.218074	0	0	0
cel-miR-357-3p	2.49211	2.14778	1.09037	2.2155	0.728951	5.82805
cel-miR-357-5p	0	0.357964	0	0	0	0
cel-miR-358-3p	0	0	0.218074	0	0	0
cel-miR-358-5p	0	0.357964	0.654221	0	0	0
cel-miR-359	151.112	144.975	227.887	144.561	99.8663	67.8796
cel-miR-360-3p	0.45311	1.78982	1.96266	0	0	0.685653
cel-miR-360-5p	0	12.5287	13.5206	0.553875	0	0.342826
cel-miR-36-3p	517.225	344.361	308.138	282.476	404.568	384.994
cel-miR-36-5p	1.58589	3.9376	5.23377	1.66162	5.10266	2.05696
cel-miR-37-3p	1114.88	366.197	404.527	385.497	185.883	419.62
cel-miR-37-5p	3.39833	2.50575	3.48918	4.431	0.728951	1.02848
cel-miR-38-3p	48.4828	71.5928	58.6618	20.4934	36.4476	28.1118
cel-miR-38-5p	0.45311	0.357964	1.30844	0.553875	0	0
cel-miR-392-3p	0.45311	0	0.654221	0.553875	0	0
cel-miR-392-5p	0.226555	0	0	0	0	0
cel-miR-39-3p	2470.58	1574.68	1608.95	1923.05	1902.56	1922.91
cel-miR-39-5p	6.34354	3.57964	6.10607	4.431	1.4579	8.57066
cel-miR-40-3p	751.936	459.268	418.266	381.066	499.332	718.907
cel-miR-40-5p	14.7261	15.3925	22.0255	8.862	3.64476	15.4272
cel-miR-41-3p	0	2.50575	3.70725	0.553875	0	0.342826
cel-miR-41-5p	3.17177	3.22168	1.96266	2.2155	3.64476	7.88501
cel-miR-42-3p	1789.56	823.317	1055.26	1831.11	1253.07	1792.3
cel-miR-42-5p	15.8589	22.1938	17.0098	12.7391	64.1477	78.1644
cel-miR-43-3p	40.7799	98.7981	98.7874	26.0321	24.7843	28.1118
cel-miR-43-5p	0.45311	1.78982	0	0	0.728951	0.685653
cel-miR-44-3p	50604.7	56108.4	68441.6	75241.1	52904.4	56635.3
cel-miR-44-5p	258.952	430.273	926.595	328.448	318.552	518.696
cel-miR-45-5p	478.711	835.13	699.581	556.644	567.853	899.577
cel-miR-46-3p	13960.8	8204.53	8333.47	10342.5	5521.08	14038.7
cel-miR-46-5p	513.827	549.117	503.532	400.452	482.566	459.73
cel-miR-47-3p	11340	9343.58	11771.8	11720.5	7541.73	10375.6
cel-miR-47-5p	142.73	132.447	139.349	192.195	88.932	125.474
cel-miR-4805-3p	1.35933	1.43186	0.654221	0	1.4579	0.685653
cel-miR-4805-5p	0	0.715928	0	0	0	0
cel-miR-4806-3p	0	0	0.218074	0	2.9158	0
cel-miR-4806-5p	6.5701	8.59114	6.10607	2.2155	5.10266	6.17088
cel-miR-4807	41.9127	48.3251	60.4064	37.1096	86.0162	81.2499
cel-miR-4808-3p	24.2414	33.6486	48.4124	45.4177	19.6817	20.9124
cel-miR-4808-5p	0	0	0.218074	0	0	0
cel-miR-4809-3p	2.039	2.86371	2.39881	0.553875	4.37371	2.74261
cel-miR-4810a	2.49211	0.357964	1.30844	1.10775	2.9158	1.71413
cel-miR-4810b-3p	0.226555	1.78982	1.30844	0.553875	2.9158	3.08544
cel-miR-4810b-5p	0	0.357964	0	0	0	0
cel-miR-4811-3p	0.45311	1.07389	0.218074	0.553875	0	0
cel-miR-4812-3p	0	0	0.218074	0.553875	0	0
cel-miR-4812-5p	2.039	2.14778	1.30844	1.10775	3.64476	2.39978
cel-miR-4813-3p	148.167	136.742	254.492	210.472	69.9793	89.1349
cel-miR-4813-5p	8.15598	25.0575	21.5893	2.76937	18.2238	7.88501
cel-miR-4814-3p	2.039	4.65353	5.88799	4.431	1.4579	4.79957
cel-miR-4814-5p	0.90622	1.43186	1.52652	1.10775	0	0
cel-miR-4816-3p	8.15598	13.9606	4.36148	4.431	42.2792	18.1698
cel-miR-4816-5p	37.8347	83.7636	50.375	28.2476	59.045	51.7668
cel-miR-48-3p	12.6871	13.2447	10.2495	2.2155	0	0.685653
cel-miR-48-5p	2066.18	2804.65	1151.65	657.449	134.856	157.7
cel-miR-4920	1.58589	6.44335	2.61689	1.10775	0.728951	0.342826
cel-miR-4921	0	0	0	0	0	0.342826
cel-miR-4923a	0.226555	0	0	0	0	0
cel-miR-4923b	0	0.357964	0.218074	0	0	0
cel-miR-4925	0.226555	0	0	0	0	0
cel-miR-4926	0.679665	0.357964	0.654221	0	0	0.342826
cel-miR-4929	0.45311	0.715928	1.09037	0.553875	0.728951	0.685653
cel-miR-4935	0	0	0.218074	0	0	0.342826
cel-miR-4936	0.45311	0	0.218074	0	0	0
cel-miR-49-3p	1881.54	1011.96	1109.78	1580.76	597.011	1822.12
cel-miR-49-5p	166.971	134.237	176.858	121.299	115.903	82.6212
cel-miR-50-3p	5.89043	4.65353	3.92533	1.10775	2.18685	6.17088
cel-miR-50-5p	6498.51	4864.73	3796.66	2475.27	9302.15	5737.54
cel-miR-51-3p	46.6704	38.3021	46.4497	33.7864	10.2053	20.5696
cel-miR-51-5p	16777.3	15467.6	13394.3	8907.97	20135.1	14558.5
cel-miR-52-3p	50.0687	38.6601	61.7149	28.2476	11.6632	42.1677
cel-miR-52-5p	38095.5	30554	17416	21836	42762.5	45998.4
cel-miR-53-3p	0.45311	0.357964	1.74459	1.10775	0	0
cel-miR-53-5p	1813.57	1725.74	962.796	2091.43	2187.58	2494.75
cel-miR-54-3p	15415	18292.7	11917.5	10008.5	31394.5	15302.1
cel-miR-54-5p	447.673	453.54	562.412	499.595	201.919	457.673
cel-miR-55-3p	8411.54	5450	3642.92	5709.9	10841.7	17950
cel-miR-5545-3p	0.90622	0	1.09037	0.553875	0.728951	0
cel-miR-5545-5p	5.43732	6.80132	4.79762	1.66162	8.74741	4.79957
cel-miR-5546-3p	0.226555	1.07389	0.872295	0	0	1.71413
cel-miR-5547-3p	0	0	1.09037	0.553875	0.728951	0
cel-miR-5549-3p	0	1.07389	0.218074	0	0	0
cel-miR-5550-3p	0.45311	0.715928	0.218074	1.10775	0.728951	0.685653
cel-miR-5551-3p	0.226555	0	0	0	0	0
cel-miR-5551-5p	28.0928	29.353	27.2592	29.3554	54.6713	27.4261
cel-miR-5552-3p	0	0	0	0	0	0.342826
cel-miR-5552-5p	1.35933	1.07389	1.96266	2.76937	1.4579	1.37131
cel-miR-5553-3p	0.45311	0.357964	0.436148	0.553875	0	0
cel-miR-55-5p	8.15598	6.08539	10.0314	3.32325	3.64476	8.57066
cel-miR-5592-3p	0.226555	0.357964	0	7.20037	0	0.685653
cel-miR-5592-5p	0	0	0	3.32325	0	0
cel-miR-5593-5p	0.679665	0	0.436148	1.10775	2.9158	1.37131
cel-miR-5594-3p	4.5311	7.87521	18.3182	7.20037	5.10266	4.45674
cel-miR-5594-5p	0.45311	1.78982	0.872295	0	0.728951	1.37131
cel-miR-55b	8.15598	6.08539	10.0314	3.32325	2.18685	8.57066
cel-miR-56-3p	11415.2	7158.56	5725.75	7088.49	13294.6	19857.2
cel-miR-56-5p	2.49211	5.0115	6.10607	0	5.10266	4.11392
cel-miR-57-3p	47.1235	55.8424	58.8799	88.0661	51.0266	55.8807
cel-miR-57-5p	22639.9	36145.1	22960.6	37526.7	83691.6	51445.6
cel-miR-58a-3p	295181	225254	217440	224101	167072	201943
cel-miR-58a-5p	96.739	75.5304	131.062	157.854	90.3899	227.637
cel-miR-58b-5p	0.226555	0	1.09037	0.553875	0	0
cel-miR-58c	0	0	0	0	1.4579	0.342826
cel-miR-59-3p	223.383	460.342	430.696	179.455	166.201	116.561
cel-miR-59-5p	0.226555	0	0	0	0	0
cel-miR-60-3p	2172.44	3404.6	2602.49	1117.17	1752.4	1336.34
cel-miR-60-5p	4.75766	3.22168	2.83496	1.10775	0.728951	5.1424
cel-miR-61-3p	15384	16306.3	16822.6	11279.1	11512.3	11502.9
cel-miR-61-5p	224.516	207.977	157.449	93.051	174.219	206.039
cel-miR-62	189.4	441.37	362.221	121.299	142.145	153.929
cel-miR-63-3p	1498.89	1256.81	916.346	994.205	1856.64	2094.33
cel-miR-63-5p	371.55	430.631	506.149	464.147	419.876	340.769
cel-miR-64-3p	5.43732	7.51724	5.88799	2.76937	1.4579	3.77109
cel-miR-64-5p	6916.05	12746.4	5581.6	7447.96	9265.7	5230.16
cel-miR-65-3p	4.30455	9.66503	7.63258	17.1701	5.10266	3.77109
cel-miR-65-5p	7066.48	11907	4918.87	5877.17	9519.37	6406.05
cel-miR-66-3p	10.195	5.36946	8.72295	11.6314	2.9158	9.25631
cel-miR-66-5p	14456	12550.9	8387.34	11884.5	15267.9	16135.1
cel-miR-67-3p	24.2414	35.4384	25.5146	4.98487	18.9527	22.2837
cel-miR-67-5p	20.6165	17.1823	14.1748	3.87712	10.2053	22.9694
cel-miR-70-3p	51616.1	79663.1	47174.8	10382.9	20963.2	11034.6
cel-miR-70-5p	7.70287	5.36946	9.59525	2.2155	0	0.342826
cel-miR-71-3p	122.113	231.961	118.85	122.96	136.314	216.666
cel-miR-71-5p	30817.8	30782.4	42878.3	87485.6	121747	125147
cel-miR-72-3p	50.5218	52.9787	90.9368	104.682	41.5502	107.99
cel-miR-72-5p	61402.3	57126	50342.6	103947	57978.6	84074.1
cel-miR-73-3p	5771.26	5946.14	3315.38	6504.15	12045.2	11922.8
cel-miR-73-5p	36.2488	54.7685	33.1472	18.2779	25.5133	22.9694
cel-miR-74-3p	683.064	417.386	499.171	471.901	212.854	487.499
cel-miR-74-5p	24.9211	83.4056	65.6402	24.3705	66.3346	24.3407
cel-miR-75-3p	160.174	112.401	93.3356	115.206	44.466	120.332
cel-miR-75-5p	2.71866	2.50575	3.48918	8.30812	0.728951	7.88501
cel-miR-76-3p	609.207	344.361	317.079	474.117	188.069	749.076
cel-miR-76-5p	0.679665	1.07389	0.654221	0.553875	0	0.685653
cel-miR-77-3p	140.917	184.709	18.3182	97.482	34.2607	25.712
cel-miR-77-5p	148.167	308.923	56.263	55.3875	26.9712	14.7415
cel-miR-78	0.679665	4.65353	1.96266	8.30812	7.28951	6.17088
cel-miR-784-3p	0	0	0.218074	0	0	0.342826
cel-miR-784-5p	7.24976	6.44335	8.50488	8.862	5.83161	3.08544
cel-miR-785-3p	78.6146	194.016	309.665	119.637	51.0266	35.6539
cel-miR-786-3p	0.226555	0	0.436148	0	1.4579	0.342826
cel-miR-786-5p	0.226555	0	0.436148	0	0	0.342826
cel-miR-787-3p	465.571	366.197	161.811	178.348	854.331	560.864
cel-miR-788-3p	192.345	165.379	113.18	44.8639	66.3346	150.158
cel-miR-788-5p	485.281	655.79	199.756	199.949	476.734	190.954
cel-miR-789-2-5p	9.0622	8.9491	8.2868	11.0775	37.9055	14.0559
cel-miR-789-3p	1.35933	1.07389	1.30844	6.6465	0.728951	4.79957
cel-miR-789-5p	9.74187	12.1708	13.9567	10.5236	27.7001	12.3418
cel-miR-790-3p	86.0909	84.8375	110.781	58.1569	48.8397	137.131
cel-miR-790-5p	3504.13	3883.19	3527.56	4050.49	2867.69	3180.74
cel-miR-791-3p	56.4122	52.2627	34.6737	82.5274	77.2688	79.8786
cel-miR-791-5p	12.234	12.8867	8.50488	3.32325	39.3634	20.5696
cel-miR-792-3p	36.9285	56.9163	124.738	39.879	55.4003	19.5411
cel-miR-792-5p	0.226555	0.715928	0	0	0	0.342826
cel-miR-793	723.164	634.312	531.882	584.892	766.857	784.73
cel-miR-79-3p	201.407	444.949	391.879	167.824	182.238	134.045
cel-miR-794-3p	10.4215	8.59114	3.70725	1.66162	6.56056	11.9989
cel-miR-794-5p	27.8663	25.0575	22.8977	18.8317	4.37371	15.4272
cel-miR-795-3p	53.6936	137.458	60.6245	19.9395	27.7001	38.7394
cel-miR-795-5p	70.4586	81.6158	17.4459	37.1096	109.343	154.272
cel-miR-79-5p	44.1782	80.5419	96.6067	57.0491	38.6344	88.1064
cel-miR-796	10.8746	7.87521	13.0844	6.6465	10.9343	5.82805
cel-miR-797-3p	1.58589	2.14778	0.436148	0	5.10266	2.74261
cel-miR-797-5p	20.39	20.7619	10.0314	14.9546	37.1765	16.7985
cel-miR-799	0.45311	0.357964	0.436148	0	0	0.342826
cel-miR-800-3p	4.75766	6.08539	3.27111	2.76937	4.37371	4.45674
cel-miR-800-5p	1.35933	2.14778	0	0.553875	0	0.685653
cel-miR-80-3p	16916.6	20994.6	22670.3	24040.4	48033.5	25252.9
cel-miR-80-5p	137.292	328.969	567.428	328.448	249.301	153.586
cel-miR-81-3p	6737.75	12110.3	6917.74	7863.92	16160.1	9242.26
cel-miR-81-5p	7.92943	15.3925	6.76029	3.32325	1.4579	6.5137
cel-miR-8186-3p	5.43732	2.50575	6.32414	4.431	0.728951	2.05696
cel-miR-8186-5p	4.5311	1.78982	5.23377	3.87712	0	1.37131
cel-miR-8189-3p	5.66388	2.50575	0.654221	1.10775	0	2.39978
cel-miR-8189-5p	0	0	0	0.553875	0	0
cel-miR-8190-5p	0.226555	0	0.218074	0	0	0
cel-miR-8191-5p	0	1.07389	0.872295	4.98487	0	1.02848
cel-miR-8192-3p	0.226555	0.715928	0.654221	0	0.728951	0
cel-miR-8193-3p	0	0	0	0	0	0.342826
cel-miR-8193-5p	2.039	1.07389	1.74459	0	4.37371	1.37131
cel-miR-8195-5p	0	0	0	0.553875	0	0
cel-miR-8196a-3p	95.6063	88.0591	62.5872	25.4782	77.2688	68.5653
cel-miR-8196b-3p	3.85144	5.0115	4.57955	3.32325	5.83161	6.5137
cel-miR-8199-3p	0	0.715928	0.436148	0	0	0
cel-miR-8199-5p	0.679665	2.86371	2.83496	1.10775	0	0.685653
cel-miR-8200-3p	0	0	0	0	0	1.02848
cel-miR-8201-3p	0	0.357964	0.436148	0.553875	0	0
cel-miR-8201-5p	2.039	3.22168	4.36148	2.2155	2.18685	2.74261
cel-miR-8202-5p	0	0.357964	0	0	0.728951	1.71413
cel-miR-8203-3p	0.226555	0	0.436148	0	0	0.342826
cel-miR-8203-5p	0	0	0.218074	0	0	0
cel-miR-8204-5p	0.679665	0	0.218074	0	0.728951	0
cel-miR-8205-3p	0.226555	0.715928	0.436148	0	0.728951	0
cel-miR-8205-5p	0.90622	0	1.30844	0.553875	2.18685	1.02848
cel-miR-8206-3p	0	0	0.436148	0.553875	0	0
cel-miR-8206-5p	0	0	0.436148	0	0.728951	0
cel-miR-8207-3p	0	0	0.218074	0	0.728951	0.685653
cel-miR-8208-3p	0.90622	2.14778	1.30844	0	1.4579	1.71413
cel-miR-8208-5p	0	0	0	0	0	0.685653
cel-miR-8209-3p	0.226555	0	0.218074	0	0	0
cel-miR-8210-5p	0.90622	0	0.218074	0.553875	2.9158	0
cel-miR-8211-3p	2.94522	4.29557	10.6856	7.20037	5.83161	0.685653
cel-miR-8211-5p	1.13278	1.07389	0.654221	0.553875	3.64476	1.37131
cel-miR-8212-3p	2.039	1.07389	1.74459	0.553875	2.9158	1.37131
cel-miR-82-3p	26666.4	23276.6	17186.4	23459.9	18964.4	19002.9
cel-miR-82-5p	13.3668	30.069	15.9194	1.10775	5.83161	4.11392
cel-miR-83-3p	206.845	197.596	133.679	154.531	144.332	243.407
cel-miR-83-5p	41.4596	100.946	61.0607	38.7712	124.651	143.644
cel-miR-84-3p	20.1634	41.1659	26.605	7.20037	8.01846	7.88501
cel-miR-84-5p	865.441	1142.62	509.856	445.869	891.507	561.207
cel-miR-85-3p	4.5311	5.36946	3.05303	19.9395	8.01846	3.77109
cel-miR-86-3p	1146.6	1951.98	2206.91	784.287	621.066	694.909
cel-miR-86-5p	3201	2498.95	2641.53	3245.71	1745.11	2226.66
cel-miR-87-3p	5658.89	6819.57	6573.18	6408.33	6020.41	5741.66
cel-miR-87-5p	5.89043	5.36946	10.4675	6.09262	9.47637	23.655
cel-miR-90-3p	6645.99	5410.98	5541.04	6822.08	12776.3	9248.77
cel-miR-90-5p	65.701	126.361	111.654	37.6635	117.361	150.158
novel_110	0.226555	0.357964	0.654221	1.66162	0.728951	0.342826
novel_117	1.81244	2.50575	1.09037	0	0.728951	1.37131
novel_124	2.26555	1.78982	3.92533	1.10775	2.18685	2.39978
novel_129	0	0	0.436148	0	0	0
novel_130	2.039	2.14778	2.18074	2.2155	0.728951	0.342826
novel_131	0.45311	1.43186	0.436148	0.553875	2.18685	0.685653
novel_135	6.79665	6.08539	5.66992	7.75425	8.74741	6.5137
novel_136	0.90622	0.715928	1.09037	0	0	0.685653
novel_138	10.6481	18.2562	13.5206	10.5236	48.8397	27.7689
novel_139	0.45311	1.07389	0.872295	1.10775	0	0.342826
novel_146	2.039	1.43186	0.872295	1.66162	4.37371	0.342826
novel_147	0.679665	0.357964	0.654221	0	0	0
novel_45	2.49211	3.57964	1.09037	2.2155	3.64476	6.85653
novel_58	3.62488	6.44335	7.41451	3.87712	10.9343	3.42826
novel_61	4.75766	6.80132	7.63258	7.75425	5.83161	1.71413
novel_75	2.71866	2.50575	1.74459	0.553875	0	1.02848
novel_79	0.90622	0.357964	0.218074	0	1.4579	1.02848
novel_80	0	0.357964	0.872295	0	0.728951	0
novel_83	0	0	0	0	0	0.685653
novel_86	0.45311	0.357964	0	0	0	0
novel_91	0	0	0.218074	0	0.728951	0
novel_97	0	0.715928	0.654221	0.553875	0	2.05696
novel_98	0	0	0.218074	0	0	1.02848
novel_99	0.226555	0	0.218074	0.553875	0	0
