# Supplementary material for: Essential function of transmembrane transcription factor MYRF in promoting transcription of miRNA lin-4 during C. elegans development
Source: eLife. 2024 Jul 4;12:RP89903. doi: 10.7554/eLife.89903 (PMC11223767; doi:10.7554/eLife.89903)
Supplement: Figure 7—source data 2. [file elife-89903-fig7-data2.xlsx]

## Sheet: mir-48
WT EE1	WT L2	myrf-1(ju1121) EL1	myrf-1(ju1121) L2
416.192	1419.01	425.188	558.936
353.205	1489.22	329.656	809.75
366.479	2022.95	450.428	1056.58
470.429	1427.62	268.807	742.246
344.183	1664.72	192.086	844.89
369.762	1311.68	354.924	857.551
412.278	1816.77	341.416	1123.54
446	1458.96	355.57	865.515
412.628		300.855
457.387		441.881
458.203		449.25
466.587		311.596
399.412		458.636
		326.91

## Sheet: mir-73
WT EE1	WT L2	myrf-1(ju1121) EL1	myrf-1(ju1121) L2
1436.49	764.025	1043.35	2784.91
645.074	1575.65	788.419	1636.61
781.657	1689.92	503.548	2476.8
763.864	733.385	826.998	2405.26
707.339	1562.31	738.95	1992.43
483.098	1662.25	602.851	680.249
692.105	973.007	713.782	1843.97
618.608	1483.74	634.717	2322.12
675.64	1215.49	837.788	1540.42
792.484	985.688	745.521	2698.96
518.386	1112.64	990.365	2038.87
750.019	1302.88	732.327	1847.88
609.957	942.666	896.218	1664.61
923.528	831.46	671.447	2571.99
712.212	1107.22	804.165	2225.36
683.164	1438.12	913.152	1837.08
713.284	1020.4	925.317	2019.35
689.492	1471.55	641.533	1251.58
805.338	1617.33	692.835	1172.3
500.223	1244.05	729.418	2114.67
658.924	788.759	788.759	2038.13
614.161			1137.68
668.119			2021.06
604.162			1653.72
778.232
721.504

## Sheet: mir-230
WT EE1	WT L2	myrf-1(ju1121) EL1	myrf-1(ju1121) L2
1160.18	3666.72	462.768	7469.8
545.746	4644.17	1094.75	2035.19
279.172	3160.65	1047.98	6373.22
683.527	2651.91	1305.64	7026.99
636.372	6347.5	306.898	5807.27
1113.16	4686.41	325.648	7007.97
869.297	3933.1	232.731	1734.3
978.78	3845.14	541.617	5572.47
410.818	3539.85	538.648	9295.09
422.113	9063.86	304.773	4443.14
539.845	1856.27	1919.7	6350.04
1309.4	2628.76	239.023	6376.97
572.95	841.115	764.617	9188.98
789.032	3142.55	2059.61	4829.02
738.806	5395.88	289.523	6193.91
1064.65	5176.31	452.721	5986.99
1109.3	2691.67	713.058	7071.28
950.121	3648.96	225.263	3532.5
664.149		916.943	6479.72
864.156		897.539	1544.35
699.108		1631.26
1090.6		712.251
722.571		344.422
		351.01
		1013.4
		645.112
		735.456
		1567.21
		296.072
